# Supplementary material for: Stepwise taming of triplet excitons via multiple confinements in intrinsic polymers for long-lived room-temperature phosphorescence
Source: Springer Nature journal article supplement (doi:10.1038/s41467-023-43133-1), 2023-11-09
Supplement: MOESM1 [file 41467_2023_43133_MOESM1_ESM.pdf]

## **Supplementary Information**

### **Stepwise taming of triplet excitons via multiple confinements in intrinsic polymers for long-lived room-temperature phosphorescence**

Gao et al.

## Supplementary Methods

### Materials

The following reagents used in experiments including 2,2'-azobis(2-methylpropionitrile) (AIBN, 98%, recrystallized from 95% ethanol before use), boric acid (BA, 99%), 1-vinylnaphthalene (1VN, 95%), 2-vinylnaphthalene (2VN, 97%), 9-vinylanthracene (9VA, 98%), vinylimidazole (MZ, 98%), *N*-vinylnphthalimide (NVP, 98%), and vinyl acetate (VAc, 98%) were purchased from Energy Chemical. Polyvinylalcohol (PVA, approx. Mw 47000, 98.0~99.0 % hydrolyzed) and poly(vinyl acetate) (PVAc, approx. Mw 50000) were purchased from Macklin Inc. 95% Ethanol (AR), hydrochloric acid (AR), methanol (AR), and sodium hydroxide (NaOH, 97%) were purchased from Chuan Dong Chemical, or Chron Chemicals. Deionized water was used in the experiments. Unless otherwise stated, all the chemicals were used directly without further purification.

### Synthetic routes

The synthetic routes of the systems are shown below.

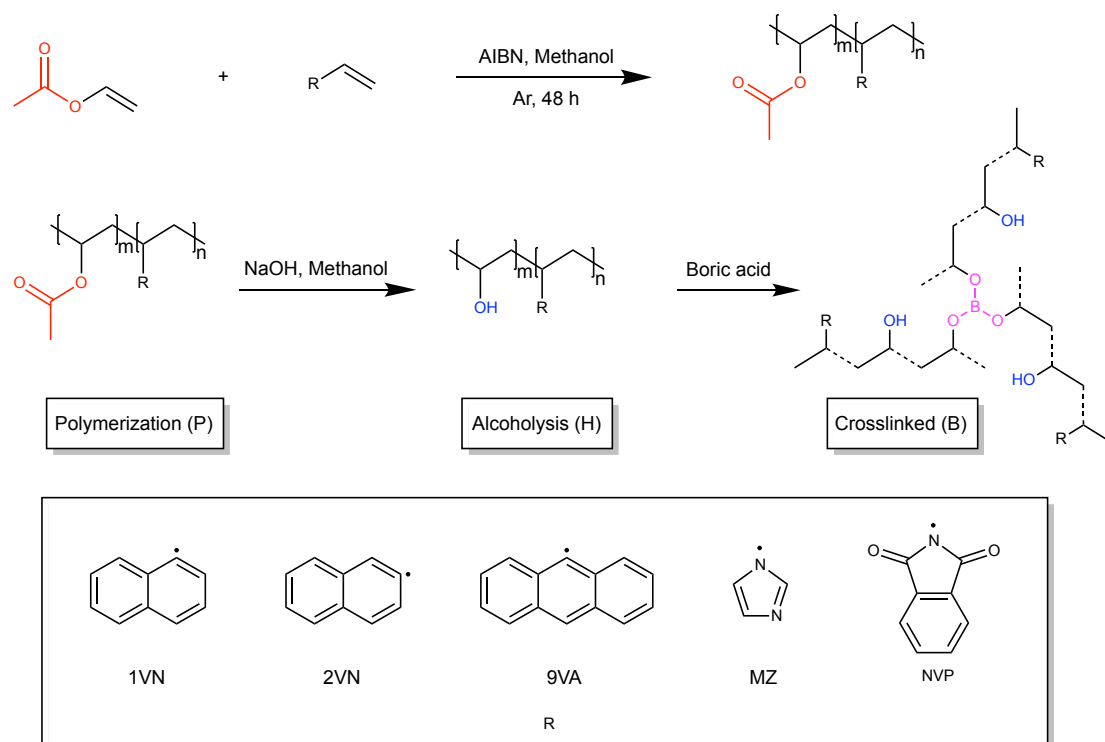

**Supplementary Figure 1.** Synthetic routes of the systems in this work.

## Kinetic calculations and photophysical rate constants

Based on the measured fluorescence and phosphorescence quantum yield efficiency and emission lifetime, the radiative and nonradiative decay rates and intersystem crossing (ISC) rate can be calculated according to standard photophysical dynamic equations (1-5).<sup>1-3</sup> It is considered that the internal conversion rate constant ( $k_{ic}$ ) is approximately negligible when the energy gap ( $\Delta E$ ) between S1 and S0 for material is larger than 2.17 eV ( $\lambda < 571$  nm) according to the formula  $\Delta E = 1240/\lambda$ .<sup>4-6</sup>  $k_r^F$  and  $k_{nr}^F$  are the radiative and nonradiative rate constants of fluorescence.  $k_r^P$  and  $k_{nr}^P$  are the radiative and nonradiative rate constants of room-temperature phosphorescence,  $\Phi_F$  and  $\Phi_P$  are the quantum yield efficiency of fluorescence and phosphorescence,  $\tau_F$  and  $\tau_P$  are the emission lifetime of fluorescence and phosphorescence respectively. The relationship between them is defined by the following formula (1-5).

$$k_r^F = \frac{\Phi_F}{\tau_F} \quad (1)$$

$$k_{nr}^F = \frac{1 - \Phi_F - \Phi_P}{\tau_F} \quad (2)$$

$$k_{isc} = \frac{\Phi_P}{\tau_F} \quad (3)$$

$$k_r^P = \frac{\Phi_P}{\tau_P} \quad (4)$$

$$k_{nr}^P = \frac{1 - \Phi_P}{\tau_P} \quad (5)$$

## Theoretical calculation details

The structure of polymerization (P), alcoholysis (H), and cross-linked (B) from 1VN, 2VN, 9VA, MZ, and NVP were optimized with dispersion-corrected density functional theory (DFT-D3) at the PBE0-D3/def2-SVP level, SOC, and the energy of S1 and T1 was calculated at PBE0/def2-SVP with the time-dependent density functional theory (TD-DFT) method using the ORCA 5.0 program<sup>7</sup>. The electrostatic potential (ESP)<sup>8,9</sup> values and IRI were calculated by the Multiwfn 3.8(dev) program B3LYPD3 GCP(DFT/TZ)def2-TZVP<sup>10</sup>. The distributions of ESP and IRI pictures were obtained from VMD 1.9.3 program<sup>11</sup>. Simplified models of the

polymeric systems are shown as follows.

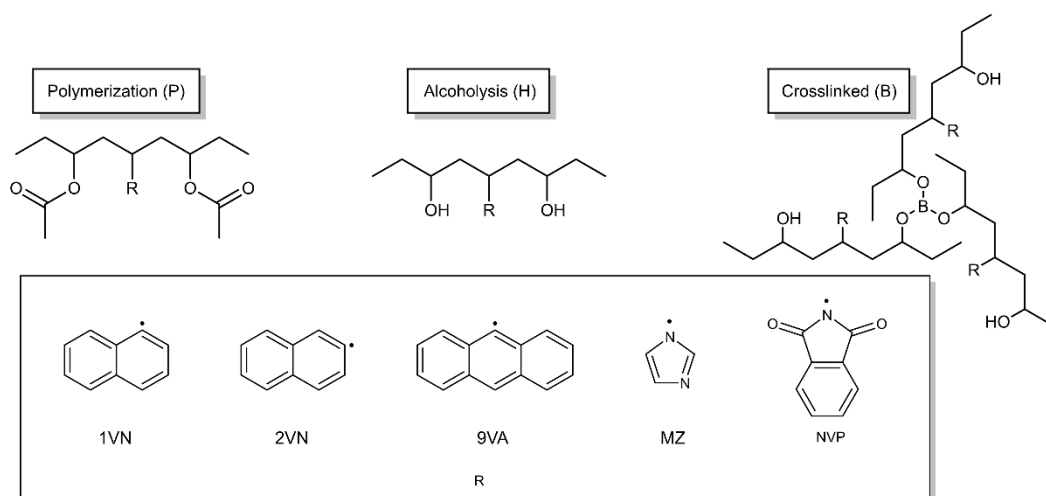

**Supplementary Figure 2.** Simplified models of the polymeric systems in this work.

### Characterization

Thermogravimetric analysis (TGA) was carried out on TA Q50 from 30 to 800 °C with a ramping rate of 10 °C min<sup>-1</sup> in a nitrogen atmosphere. TA Q20 was applied to differential scanning calorimetry (DSC) from -20 to 180 °C with a ramping rate of 10 °C min<sup>-1</sup> in a nitrogen atmosphere. FTIR spectra were carried out using a PerkinElmer Fourier transform infrared spectrometer. Powder X-ray diffraction (XRD) measurements were recorded on a PANalytical Empyrean Series 2 using Cu K $\alpha$  radiation with 2 $\theta$  range of 5-60°, 40 KeV, and 40 mA having a scanning rate of 0.026° s<sup>-1</sup> (2 $\theta$ ) at room temperature. The molecular weight was obtained by gel permeation chromatography (GPC) on Wasters-1525 and Wasters-2414 with water as the mobile phase. <sup>1</sup>H NMR was performed on AVANCE III HD 400MHz in deuterated dimethyl sulfoxide (DMSO-*d*<sub>6</sub>). The phosphorescence spectra and lifetime, steady state and time-resolved emission spectra, and temperature-dependent photoluminescence spectra were measured on Edinburgh FLS 1000 fluorescence spectrophotometer equipped with a xenon lamp (450 W), a laser device (280 nm), and a microsecond flash-lamp (100 W). excitation-dependent emission spectra were measured on Edinburgh FLS 980. Quantum efficiency was obtained on Edinburgh FLS 1000 fluorescence spectrophotometer equipped with an integrating sphere. The lifetime ( $\tau$ ) of the luminescence was obtained by fitting the decay curve with a multi-exponential decay function of equation (6):



$$I(t) = \sum_i A_i e^{-\frac{t}{\tau_i}} \quad (6)$$

where  $A_i$  and  $\tau_i$  represent the amplitudes and lifetimes of the individual components for multiexponential decay profiles, respectively. The phosphorescence lifetime was analyzed using Exponential Tail Fit analysis that contained a single decay measurement; The photoluminescence lifetime was analyzed using Exponential Reconvolution Fit analysis that contained a single decay and the instrumental response function (IRF). The X-ray photoelectron spectroscopy (XPS) measurements were performed using a Thermo ESCALAB 250 spectrometer with monochromatized Al K $\alpha$  excitation. Thermogravimetric-infrared (TG-IR) spectra were carried out on NETZSCH TG 209 F1Libra and Nicolet 6700 with a ramping rate of 10 °C min<sup>-1</sup> in a nitrogen atmosphere from 30 °C to 700 °C. The photos and supporting videos were recorded by a Canon EOS 80D camera.

## Supplementary Figures

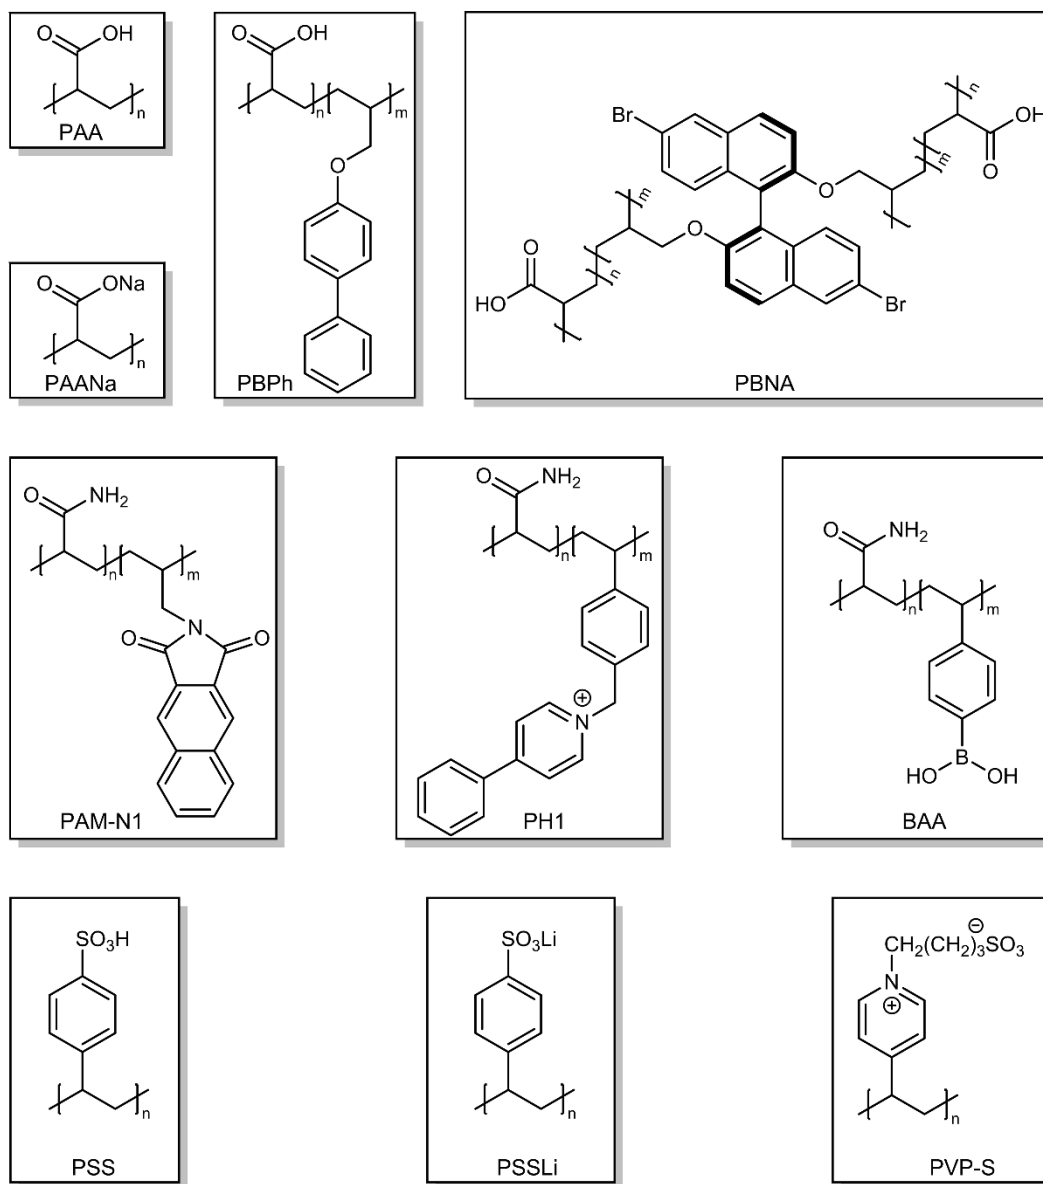

**Supplementary Figure 3. Structures of the copolymers with functionalized phosphor groups to develop a range of ambient RTP materials.** PAA: polyacrylic acid; PAM: polyacrylamide; PSS: polystyrene sulfonic acid; PVP: polyvinyl pyridine.

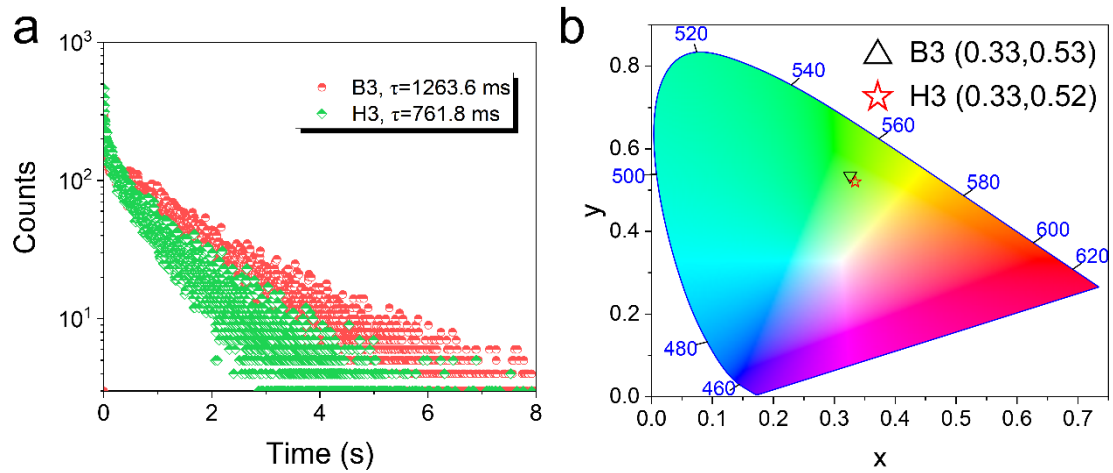

**Supplementary Figure 4. Decay spectra and fitted lifetime as well as CIE coordinates. a** Decay spectra and fitted lifetime of B3 and H3 at room temperature with  $\lambda_{\text{ex}} = 300 \text{ nm}$ ,  $\lambda_{\text{em}} = 520 \text{ nm}$ . **b** CIE coordinates of the phosphorescence from B3 and H3 exhibiting a yellow-green afterglow.

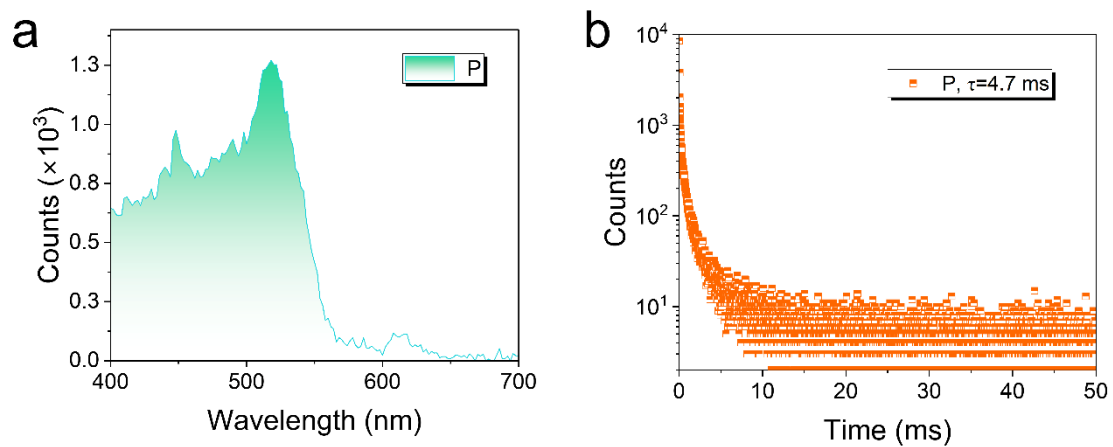

**Supplementary Figure 5. Isolated phosphorescence and decay spectra. a,b** Isolated phosphorescence (a) and decay (b) spectra of P3 at room temperature with  $\lambda_{\text{ex}} = 300 \text{ nm}$ ,  $\lambda_{\text{em}} = 518 \text{ nm}$ . Phosphorescence was delayed 5 ms.

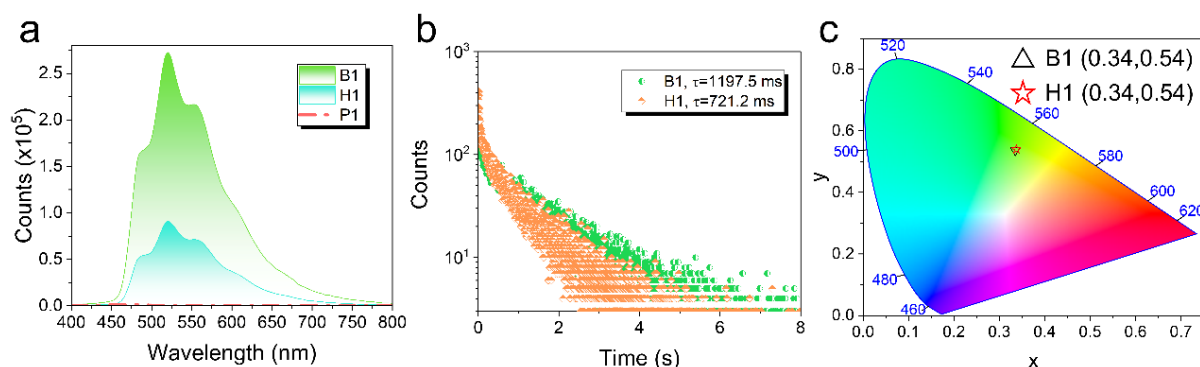

**Supplementary Figure 6. RTP emission as well as decay spectra and fitted lifetime.** **a** RTP emission spectra were collected under the same condition with  $\lambda_{\text{ex}} = 300$  nm delayed 5 ms at room temperature. **b** Decay spectra and fitted lifetime of B1 and H1 at room temperature with  $\lambda_{\text{ex}} = 300$  nm,  $\lambda_{\text{em}} = 520$  nm. **c** CIE coordinates of the phosphorescence from B1 and H1 exhibiting a yellow-green afterglow.

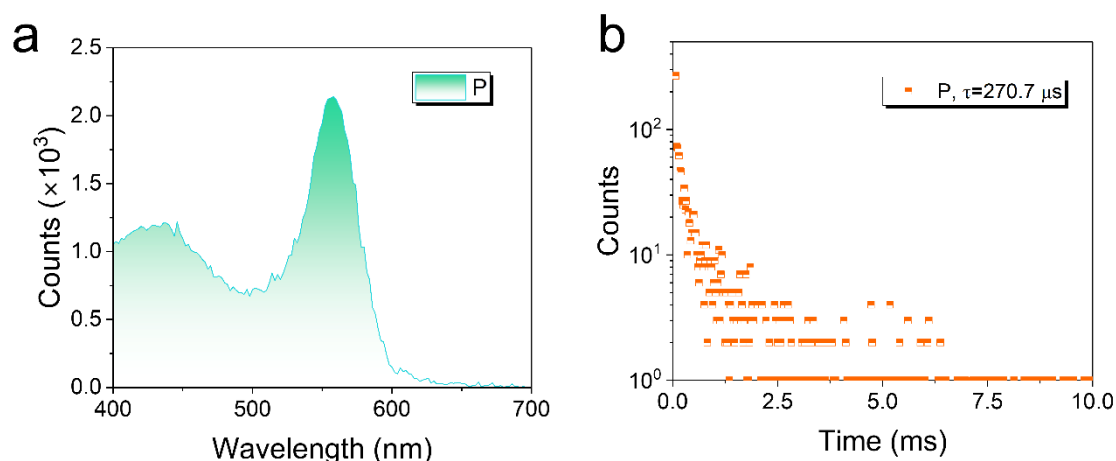

**Supplementary Figure 7. Isolated phosphorescence and decay spectra.** **a,b** Isolated phosphorescence (**a**) and decay (**b**) spectra of P1 at room temperature with  $\lambda_{\text{ex}} = 300$  nm,  $\lambda_{\text{em}} = 558$  nm. Phosphorescence was delayed 5 ms.

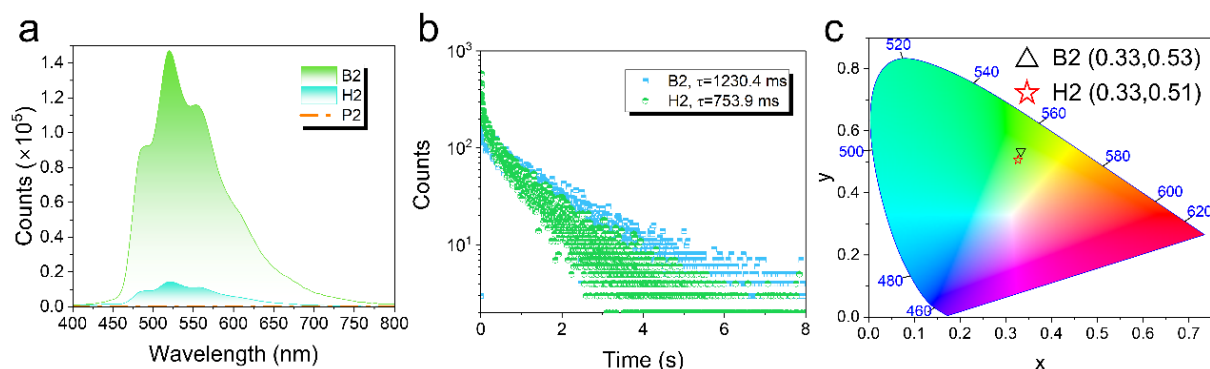

**Supplementary Figure 8. RTP emission as well as decay spectra and fitted lifetime.** **a** RTP emission spectra were collected under the same condition with  $\lambda_{\text{ex}} = 300$  nm delayed 5 ms at room temperature. **b** Decay spectra and fitted lifetime of B2 and H2 at room temperature with  $\lambda_{\text{ex}} = 300$  nm,  $\lambda_{\text{em}} = 520$  nm. **c** CIE coordinates of the phosphorescence from B2 and H2 exhibiting a yellow-green afterglow.

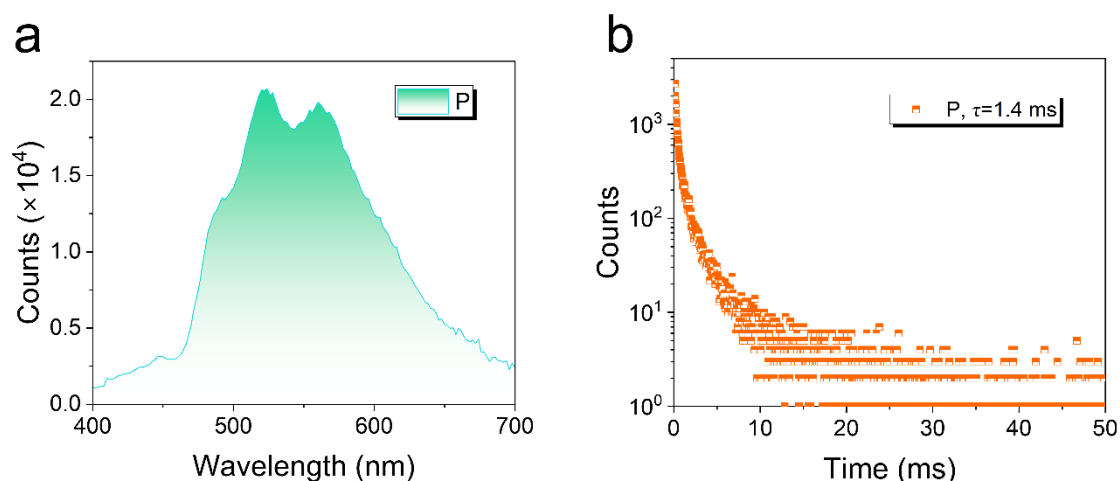

**Supplementary Figure 9. Isolated phosphorescence and decay spectra.** **a,b** Isolated phosphorescence (**a**) and decay (**b**) spectra of P2 at room temperature with  $\lambda_{\text{ex}} = 300$  nm,  $\lambda_{\text{em}} = 522$  nm. Phosphorescence was delayed 5 ms.

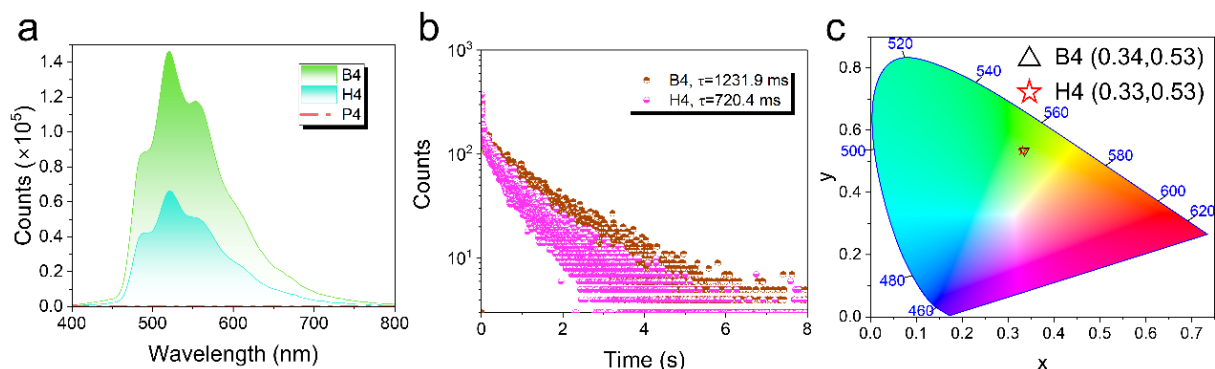

**Supplementary Figure 10. RTP emission as well as decay spectra and fitted lifetime.** **a** RTP emission spectra were collected under the same condition with  $\lambda_{\text{ex}} = 300$  nm delayed 5 ms at room temperature. **b** Decay spectra and fitted lifetime of B2 and H2 at room temperature with  $\lambda_{\text{ex}} = 300$  nm,  $\lambda_{\text{em}} = 520$  nm. **c** CIE coordinates of the phosphorescence from B4 and H4 exhibiting a yellow-green afterglow.

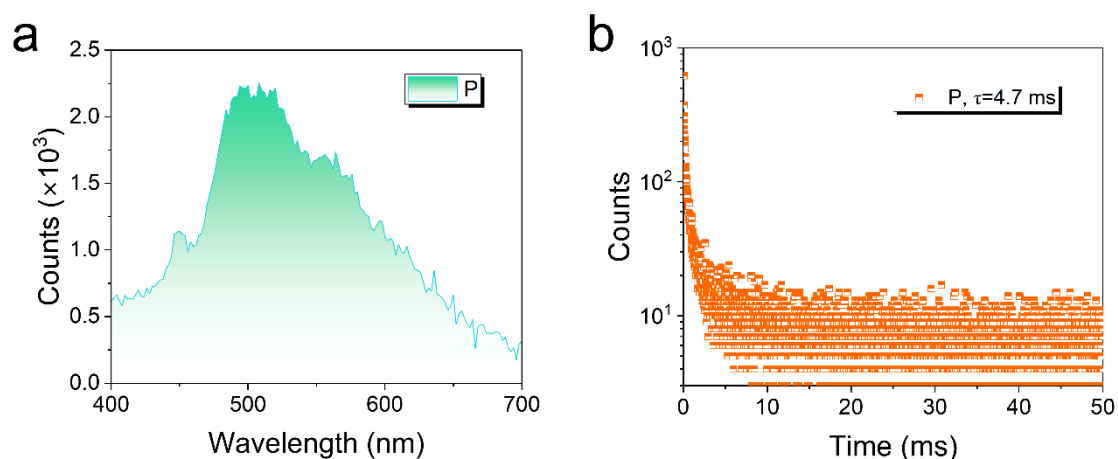

**Supplementary Figure 11. Isolated phosphorescence and decay spectra.** **a, b** Isolated phosphorescence (**a**) and decay (**b**) spectra of P4 at room temperature with  $\lambda_{\text{ex}} = 300$  nm,  $\lambda_{\text{em}} = 508$  nm. Phosphorescence was delayed 5 ms.

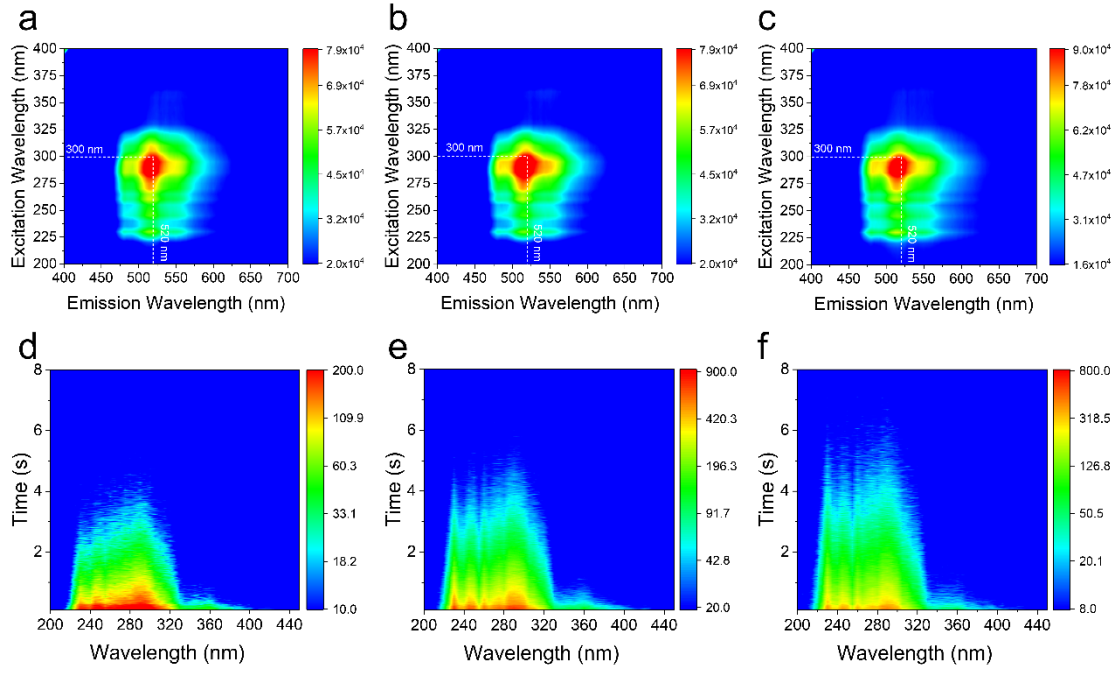

**Supplementary Figure 12. Two-dimension emission and excitation spectra.** a-c Two-dimension excitation-dependent emission spectra of B1 (a), B2 (b), and B4 (c). d-f Two-dimension time resolution excitation spectra of B1 (d), B2 (e), and B4 (f) at  $\lambda_{em} = 520$  nm.

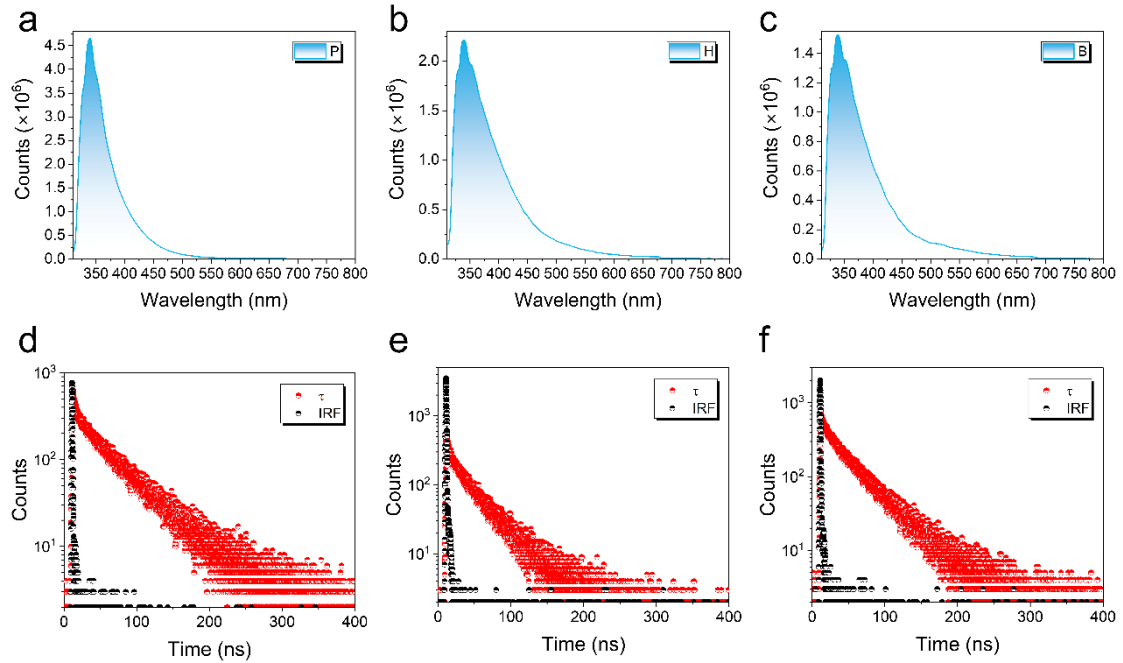

**Supplementary Figure 13. Photoluminescence spectra and decay spectra.** a-c Photoluminescence spectra at  $\lambda_{ex} = 300$  nm for P1 (a), H1 (b), and B1 (c). d-f Photoluminescence decay spectra with IRF at  $\lambda_{em} = 340$  nm, 340 nm, and 338 nm for P1 (d), H1 (e), and B1 (f).

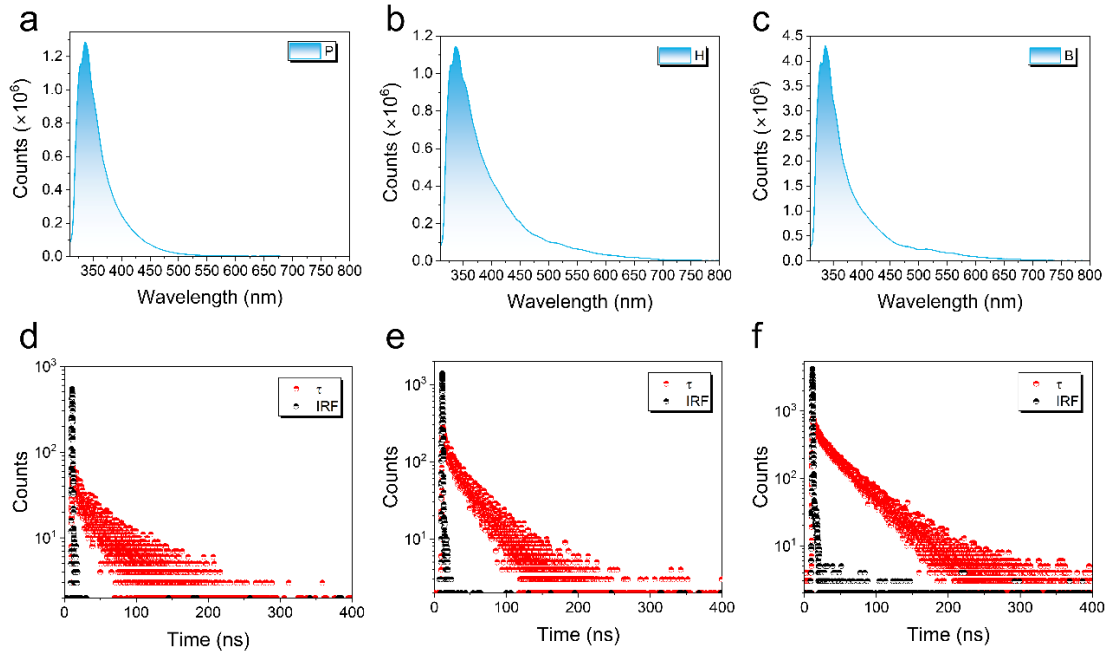

**Supplementary Figure 14. Photoluminescence spectra and decay spectra.** a-c Photoluminescence spectra at  $\lambda_{\text{ex}} = 300$  nm for P2 (a), H2 (b), and B2 (c). d-f Photoluminescence decay spectra with IRF at  $\lambda_{\text{em}} = 336$  nm, 338 nm, and 336 nm for P2 (d), H2 (e), and B2 (f).

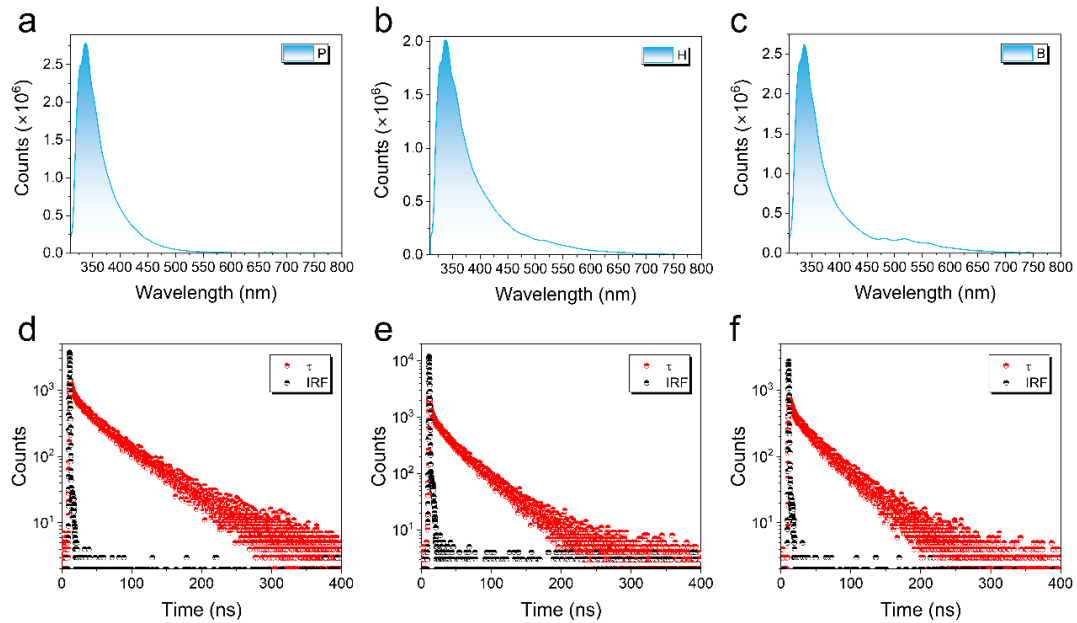

**Supplementary Figure 15. Photoluminescence spectra and decay spectra.** a-c Photoluminescence spectra at  $\lambda_{\text{ex}} = 300$  nm for P3 (a), H3 (b), and B3 (c). d-f Photoluminescence decay spectra with IRF at  $\lambda_{\text{em}} = 338$  nm, 338 nm, and 336 nm for P3 (d), H3 (e), and B3 (f).



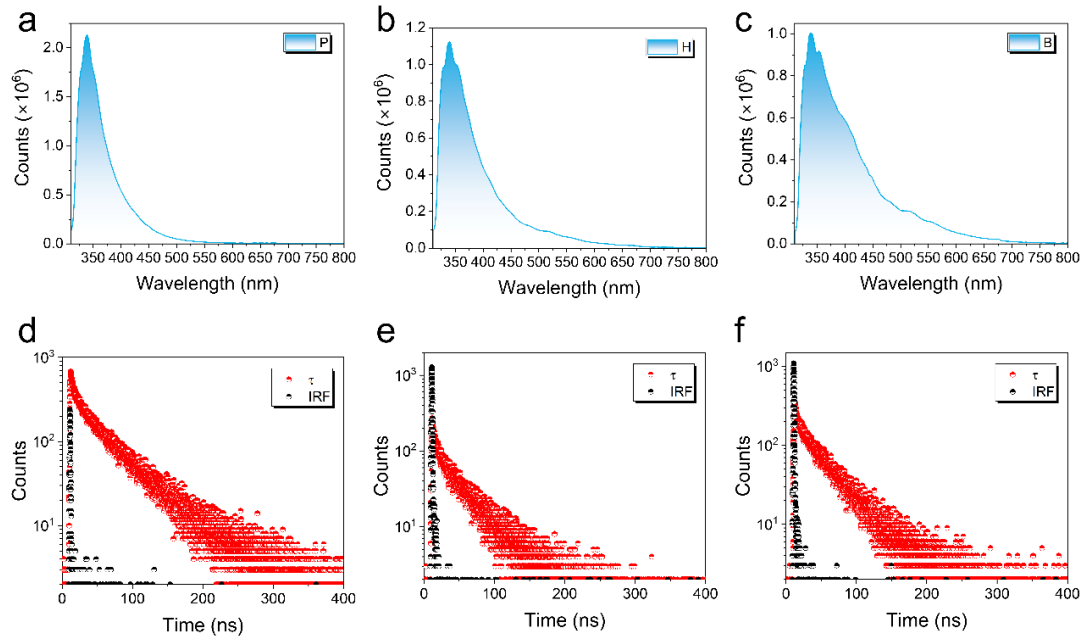

**Supplementary Figure 16. Photoluminescence spectra and decay spectra.** a-c Photoluminescence spectra at  $\lambda_{\text{ex}} = 300$  nm for P4 (a), H4 (b), and B4 (c). d-f Photoluminescence decay spectra with IRF at  $\lambda_{\text{em}} = 340$  nm, 340 nm, and 340 nm for P4 (d), H4 (e), and B4 (f).

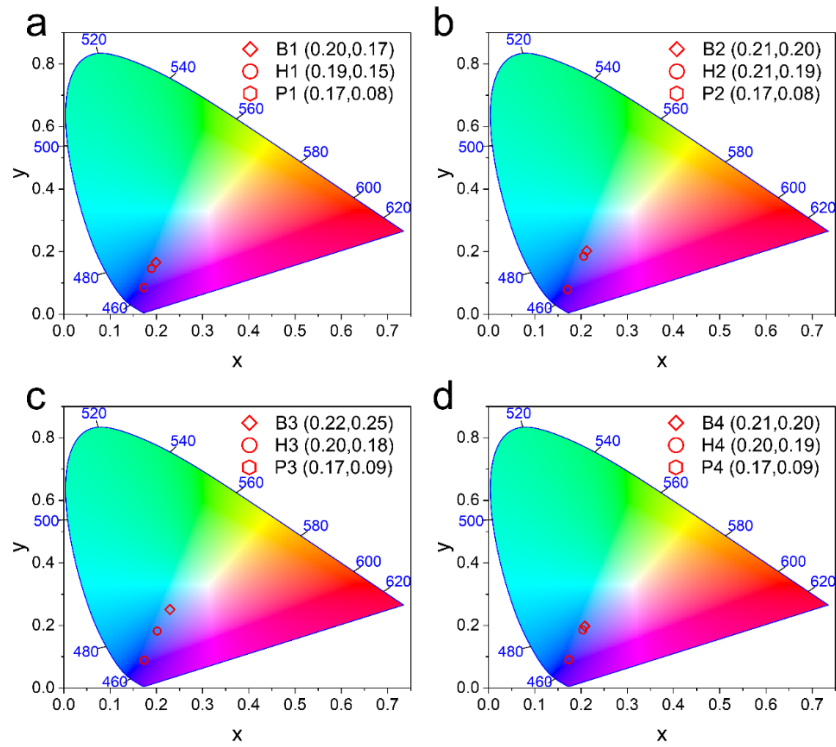

**Supplementary Figure 17. CIE coordinates.** a-d CIE coordinates from the photoluminescence spectra exhibiting a blue color.

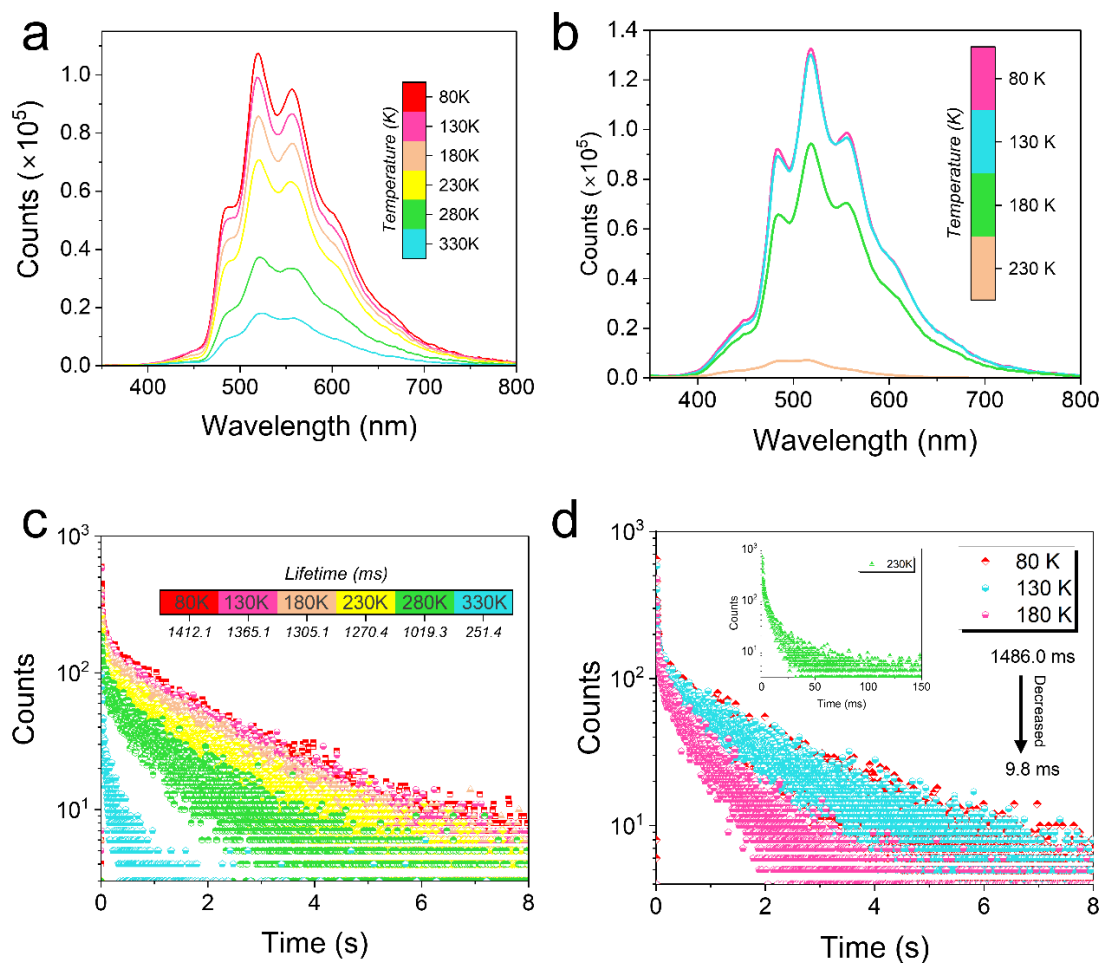

**Supplementary Figure 18. Temperature-dependent phosphorescence as well as decay spectra and fitted lifetime. a,b** Temperature-dependent phosphorescence of H3 (a) and P3 (b) at 520 nm excited by 300 nm  $\mu$ F lamp (delayed 5 ms). **c,d** Decay spectra and fitted lifetime from H3 (c) and P3 (d).

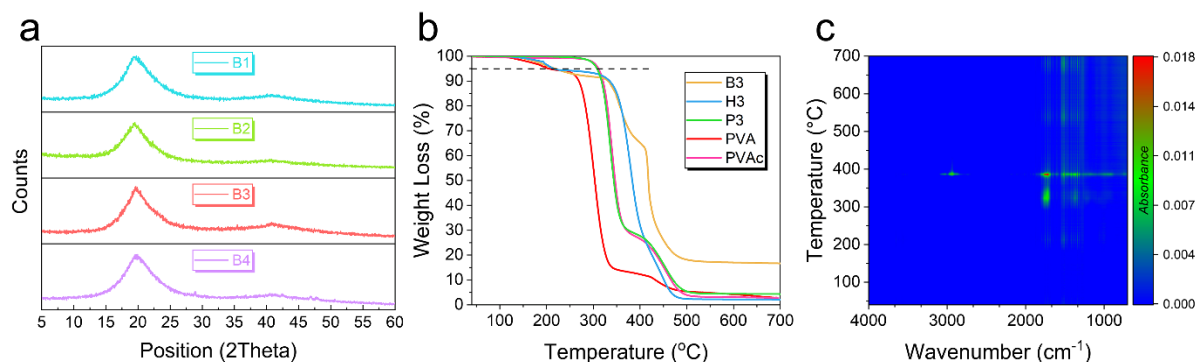

**Supplementary Figure 19. XRD, TGA and TG-IR.** **a** Powder X-ray diffraction (XRD) of B1–B4 at room temperature. **b** Thermogravimetric analysis (TGA) of P3, H3, and B3 compared with PVA and PVAc (dashed line indicates 95% weight loss): the decomposition behavior of P3 is consistent with that of PVAc. The decomposition behavior of B3 and H3 is similar to the PVA. **c** TG-IR analysis of B3 from 30 °C to 700 °C: the violently decomposition of B3 begins at 300 °C.

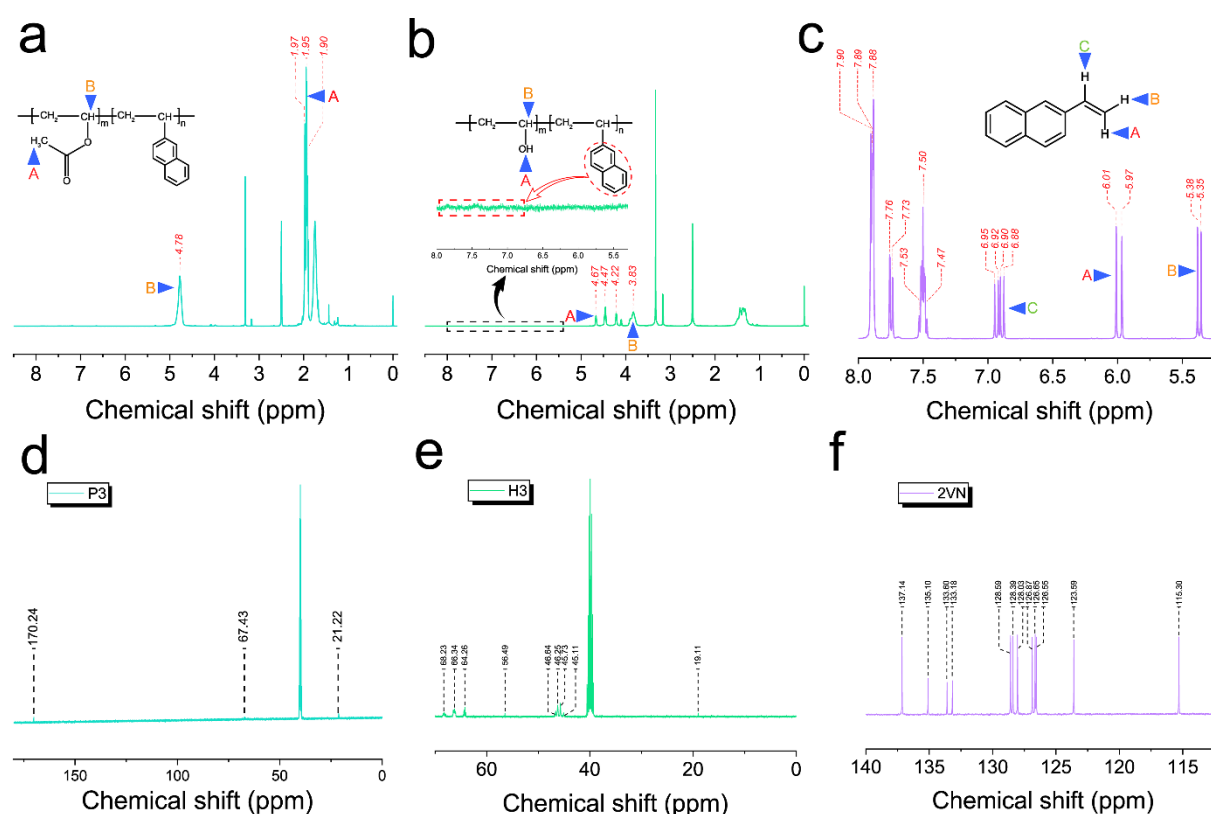

**Supplementary Figure 20. <sup>1</sup>H and <sup>13</sup>C NMR spectra.** **a-c** <sup>1</sup>H NMR spectra of P3 (**a**), H3 (**b**), and 2VN (**c**) obtained from DMSO-*d*<sub>6</sub>. **d-f** <sup>13</sup>C NMR spectra of P3 (**d**), H3 (**e**), and 2VN (**f**) obtained from DMSO-*d*<sub>6</sub>.

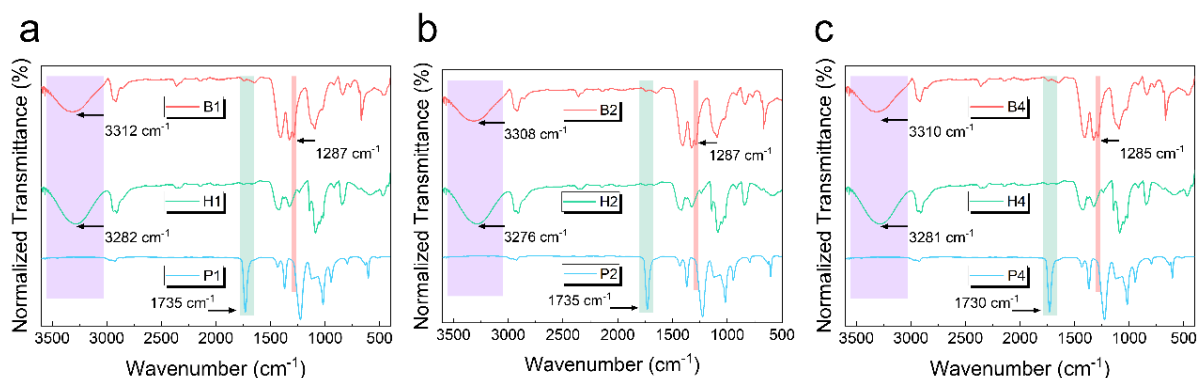

**Supplementary Figure 21. IR spectra.** a-c Comparison of IR spectra from polymerization (P), alcoholysis (H), and after cross-linking (B).

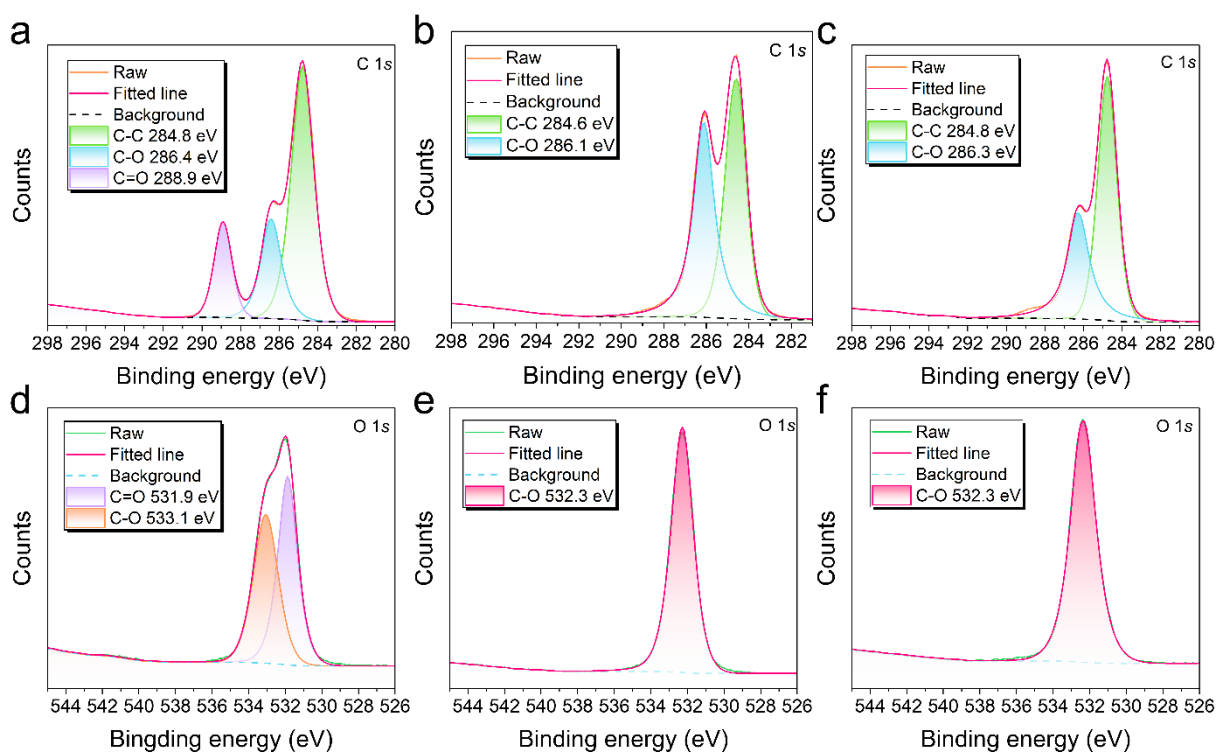

**Supplementary Figure 22. XPS spectra.** a-f Comparison of XPS high-resolution C 1s and O 1s from P3 (a,d), H3 (b,e), and B3 (c,f).

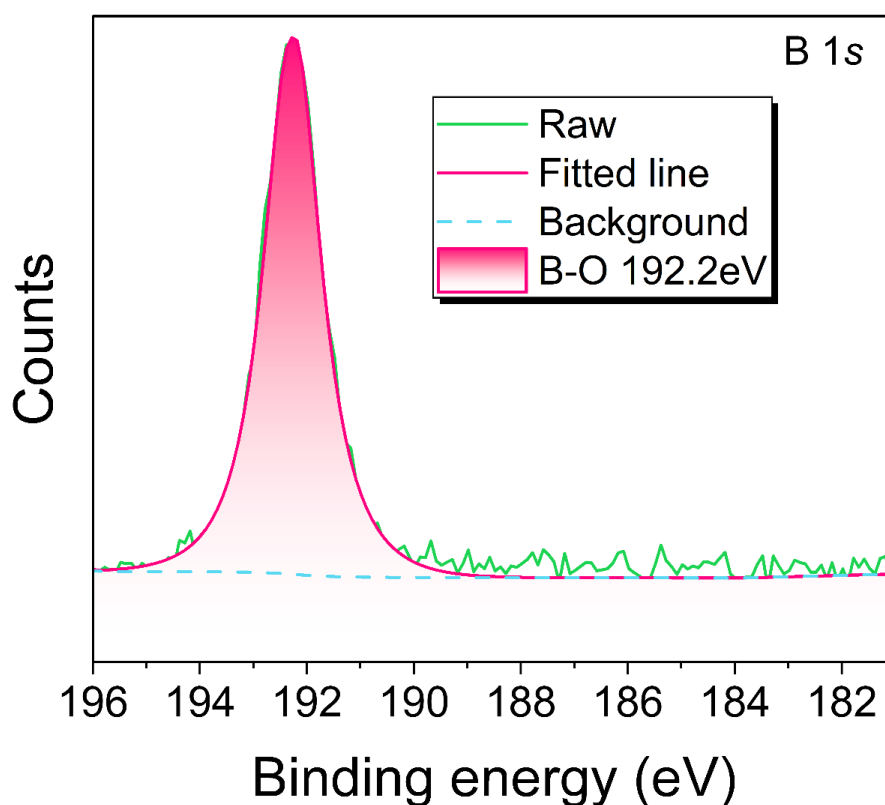

**Supplementary Figure 23.** XPS high-resolution B1s spectra of B3.

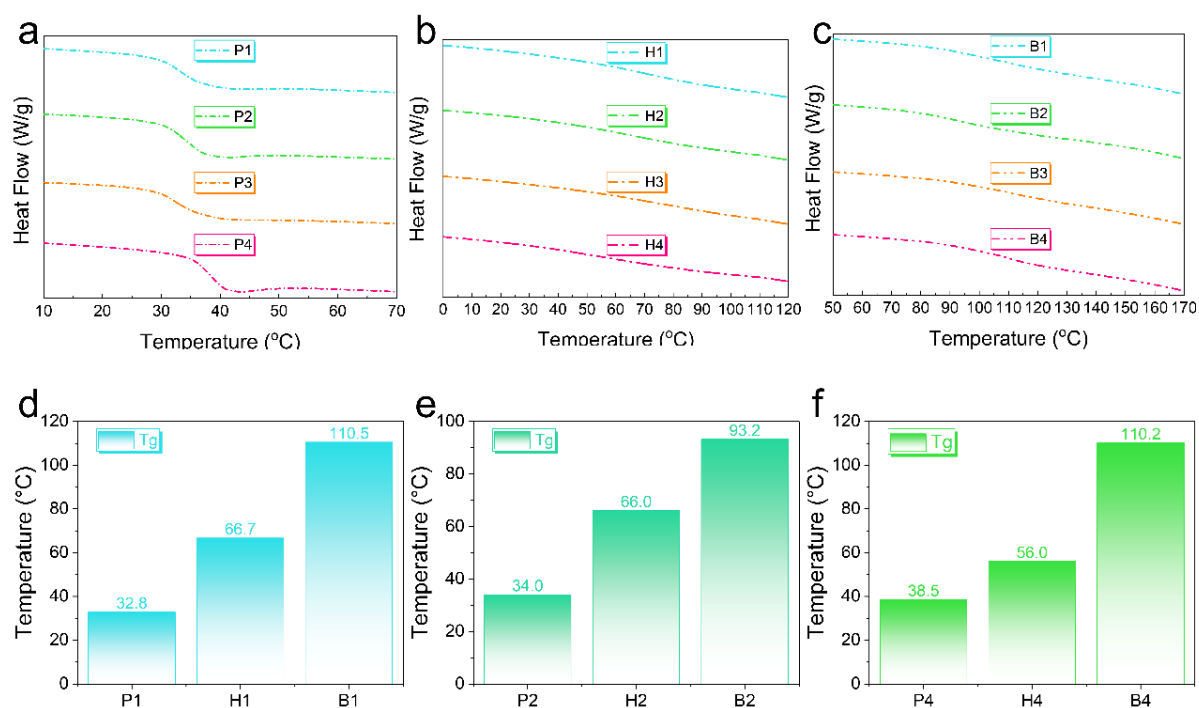

**Supplementary Figure 24. DSC results.** **a-c** DSC curves of polymerization (**a**), alcoholysis (**b**), and after cross-linking (**c**). **d-f** Comparison of Tg from P1 to B1 (**d**), P2 to B2 (**e**), and P4 to B4 (**f**).

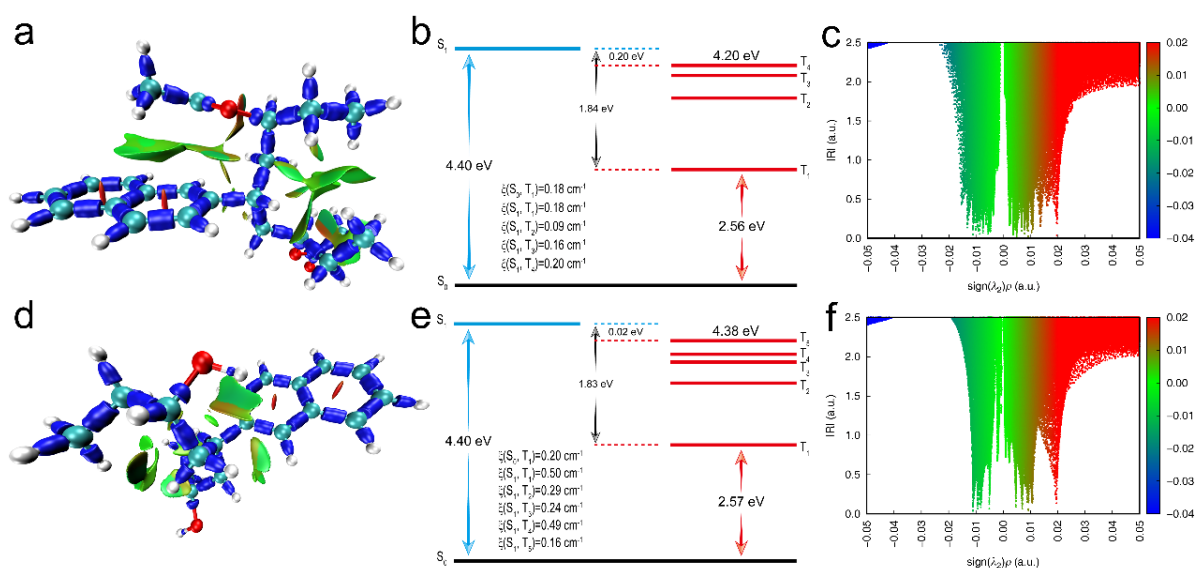

**Supplementary Figure 25. Calculation studies.** **a-f** Visualization of interactions in polymerization (**a**), and alcoholysis (**d**) structures; Theoretical calculation of the optimized simplified model: vertical excitation energy of polymerization (**b**), and alcoholysis (**e**) with boosted RTP performance: vertical excitation energies and spin-orbit coupling constant (SOC); Distribution of different interactions via  $\text{sign}(\lambda_2)\rho$  on IRI isosurfaces in polymerization (**c**), and alcoholysis (**f**).

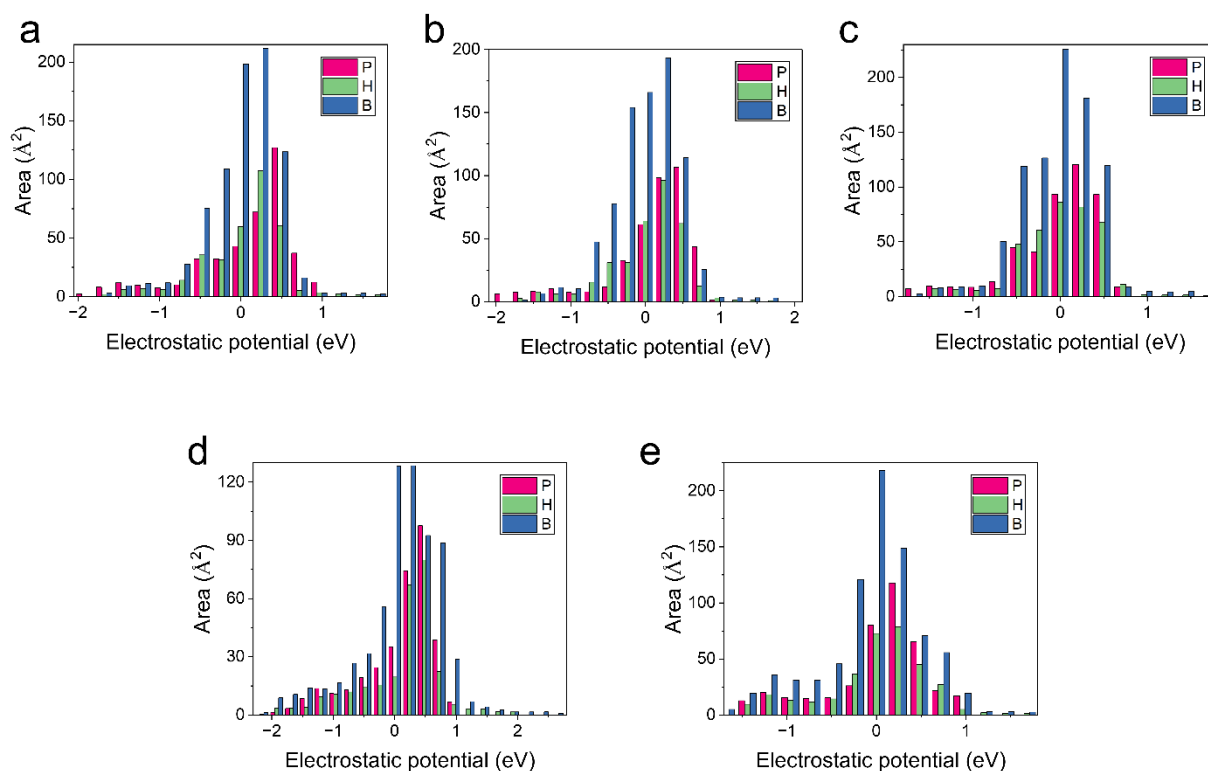

**Supplementary Figure 26. Area in ESP.** a-d Area in the electrostatic potential (ESP) of polymerization (P), alcoholysis (H), and cross-linked (B) structures from 2VN (a), 1VN (b), 9VA (c), MZ (d), and NVP (e).

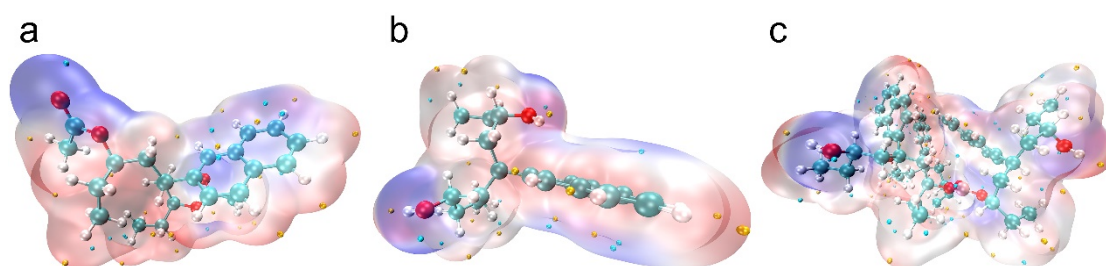

**Supplementary Figure 27. Distribution of ESP.** a-c Distribution of ESP in polymerization (a), alcoholysis (b), and cross-linked (c) structures. Negative potential (blue), positive potential (red), and neutral potential (white). The balls are the extreme point of regional potential (blue: minimum value; yellow: maximum value).

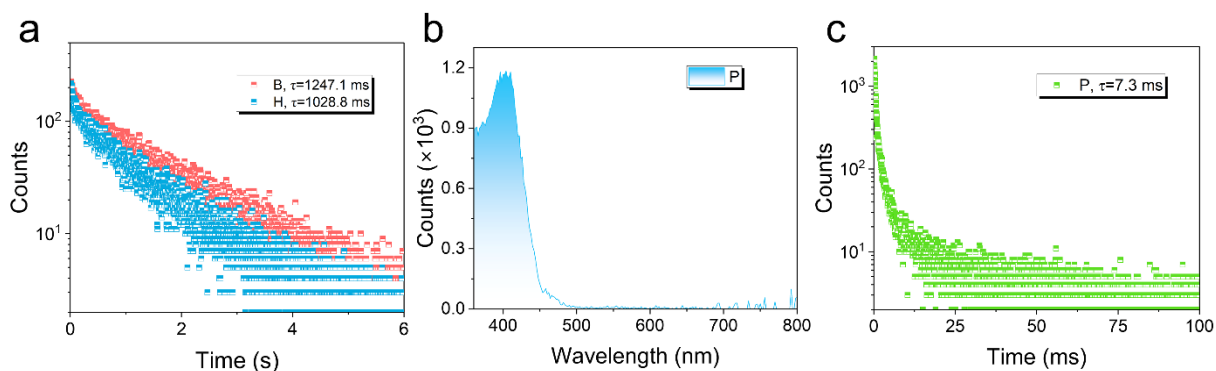

**Supplementary Figure 28. Decay spectra, isolated phosphorescence and fitted lifetime. a** Decay spectra and fitted lifetime of crosslinked (B) and alcoholysis (H) at room temperature from 1VN. **b,c** Isolated phosphorescence (**b**) and decay (**c**) spectra of polymerization (P) at room temperature with  $\lambda_{\text{ex}} = 300$  nm,  $\lambda_{\text{em}} = 404$  nm. Phosphorescence was delayed 5 ms.

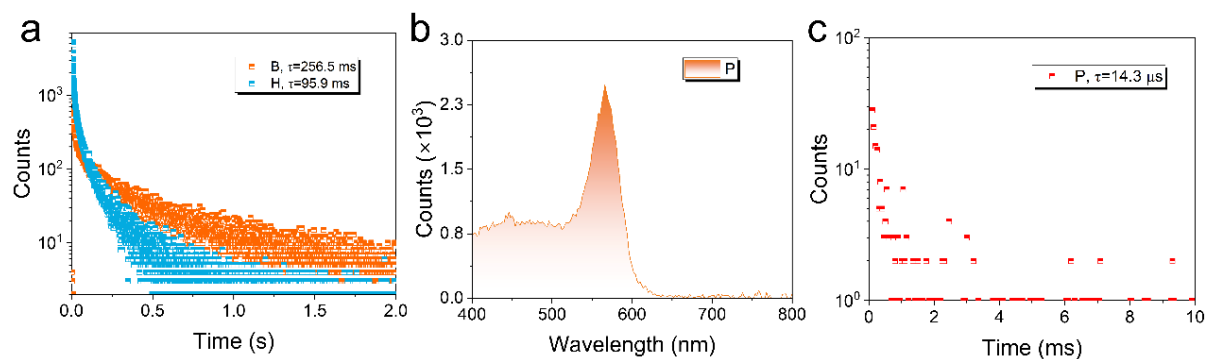

**Supplementary Figure 29. Decay spectra, isolated phosphorescence and fitted lifetime. a** Decay spectra and fitted lifetime of crosslinked (B) and alcoholysis (H) at room temperature from 9VA. **b,c** Isolated phosphorescence (**b**) and decay (**c**) spectra of polymerization (P) at room temperature with  $\lambda_{\text{ex}} = 300$  nm,  $\lambda_{\text{em}} = 566$  nm. Phosphorescence was delayed 5 ms.



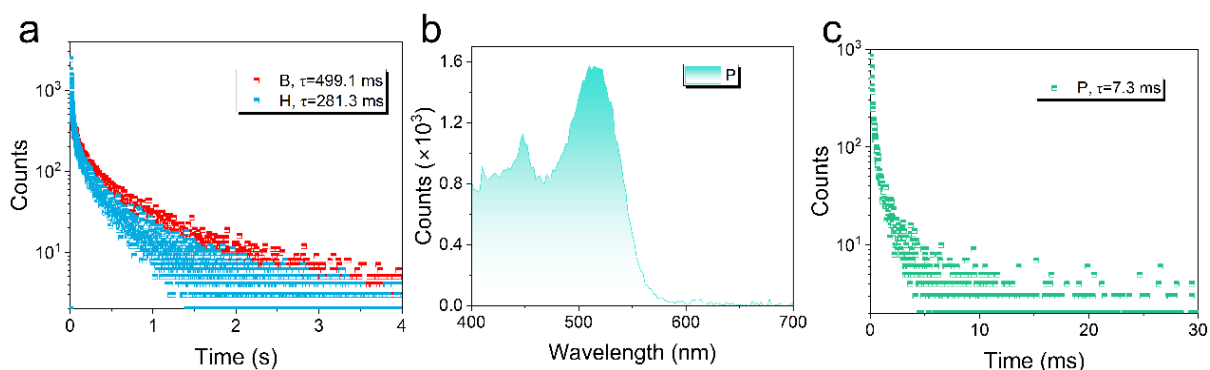

**Supplementary Figure 30. Decay spectra, isolated phosphorescence and fitted lifetime. a** Decay spectra and fitted lifetime of crosslinked (B) and alcoholysis (H) at room temperature from MZ. **b,c** Isolated phosphorescence (**b**) and decay (**c**) spectra of polymerization (P) at room temperature with  $\lambda_{\text{ex}} = 300$  nm,  $\lambda_{\text{em}} = 510$  nm. Phosphorescence was delayed 5 ms.

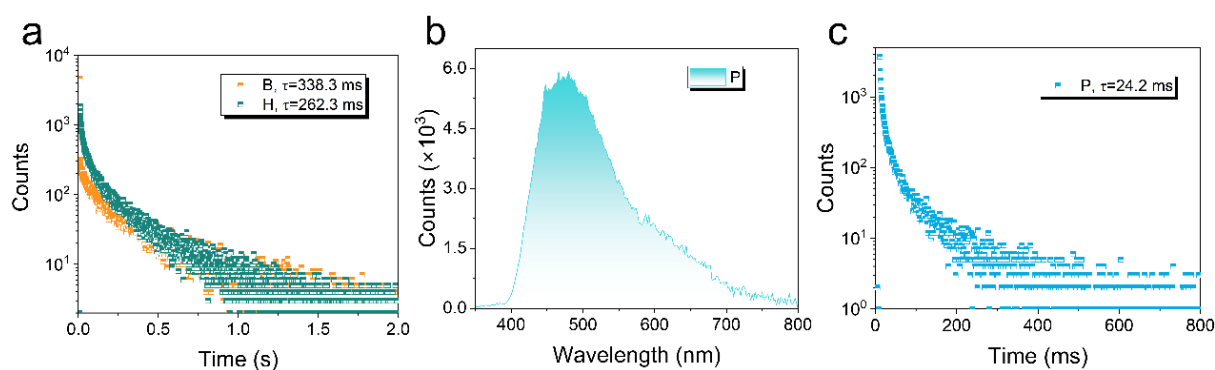

**Supplementary Figure 31. Decay spectra, isolated phosphorescence and fitted lifetime. a** Decay spectra and fitted lifetime of crosslinked (B) and alcoholysis (H) at room temperature from NVP. **b,c** Isolated phosphorescence (**b**) and decay (**c**) spectra of polymerization (P) at room temperature with  $\lambda_{\text{ex}} = 300$  nm,  $\lambda_{\text{em}} = 480$  nm. Phosphorescence was delayed 5 ms.

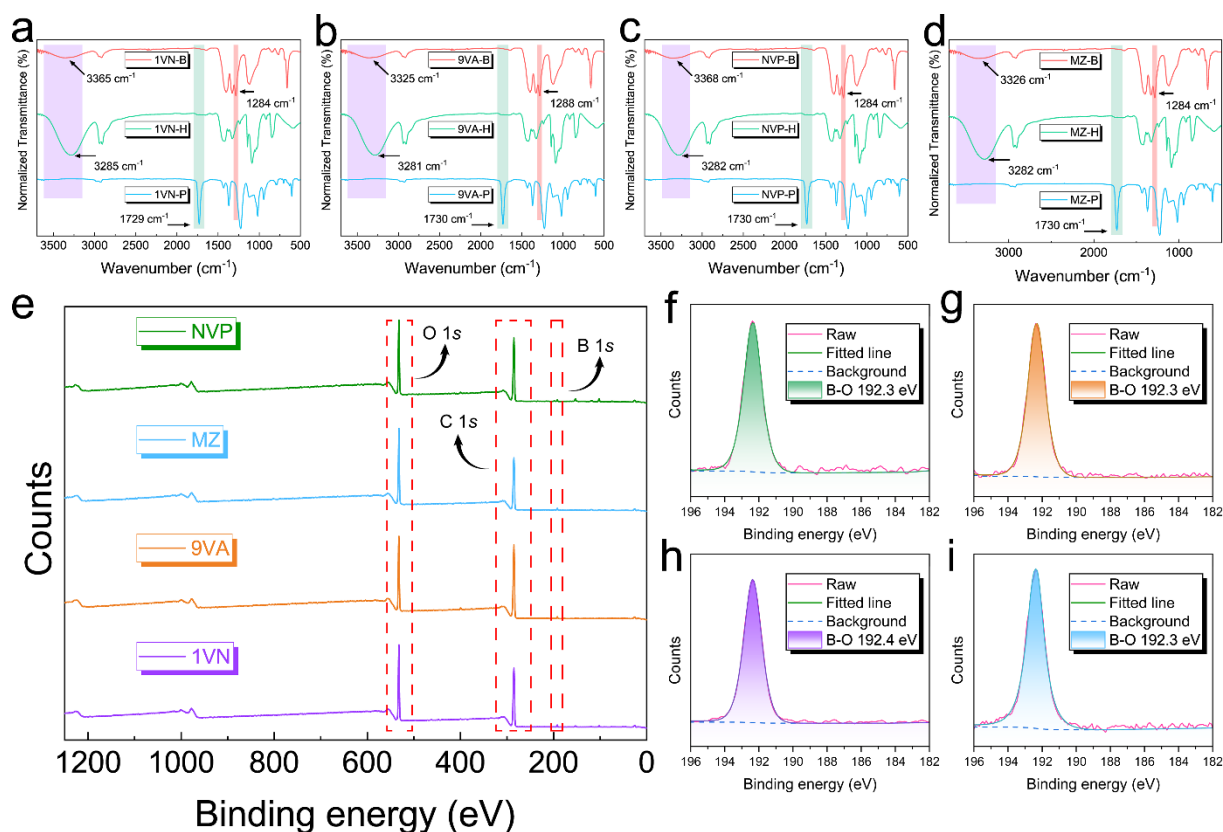

**Supplementary Figure 32. IR spectra and XPS spectra.** **a-d** Comparison of IR spectra from polymerization (P), alcoholysis (H), and cross-linked (B) of 1VN (**a**), 9VA (**b**), NVP (**c**), and MZ (**d**). **e** XPS spectra of crosslinked polymer prepared by copolymerization of different phosphorescence units. **f-i** XPS high-resolution B1s spectra of NVP (**f**), 9VA (**g**), 1VN (**h**) and MZ (**i**). The hydrogen bonding vibration at 3281-3285  $\text{cm}^{-1}$  is significantly sharper in H than in B, which was undetectable in P3. For instance, the stretching vibration of C=O at 1730  $\text{cm}^{-1}$  is stronger in P than in H and B, and the vibration of the hydrogen bond at 3325-3368  $\text{cm}^{-1}$  is weaker in B than in H. This indicates that P did not provide as strong of a hydrogen bond and covalent cross-linking as H3 and B3, with the B-O stretching vibration at 1284-1288  $\text{cm}^{-1}$  in B.

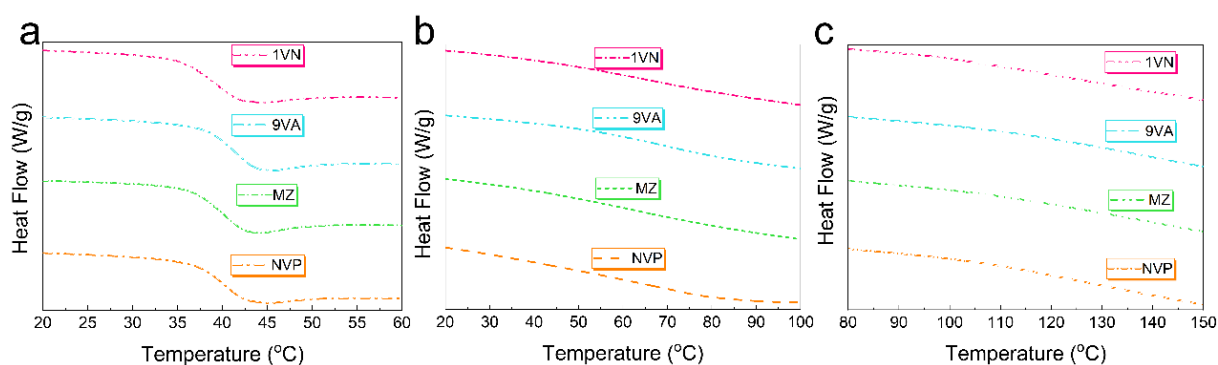

**Supplementary Figure 33. DSC curves.** a-c DSC curves of polymerization (a), alcoholysis (b), and after cross-linking (c) of different phosphors.

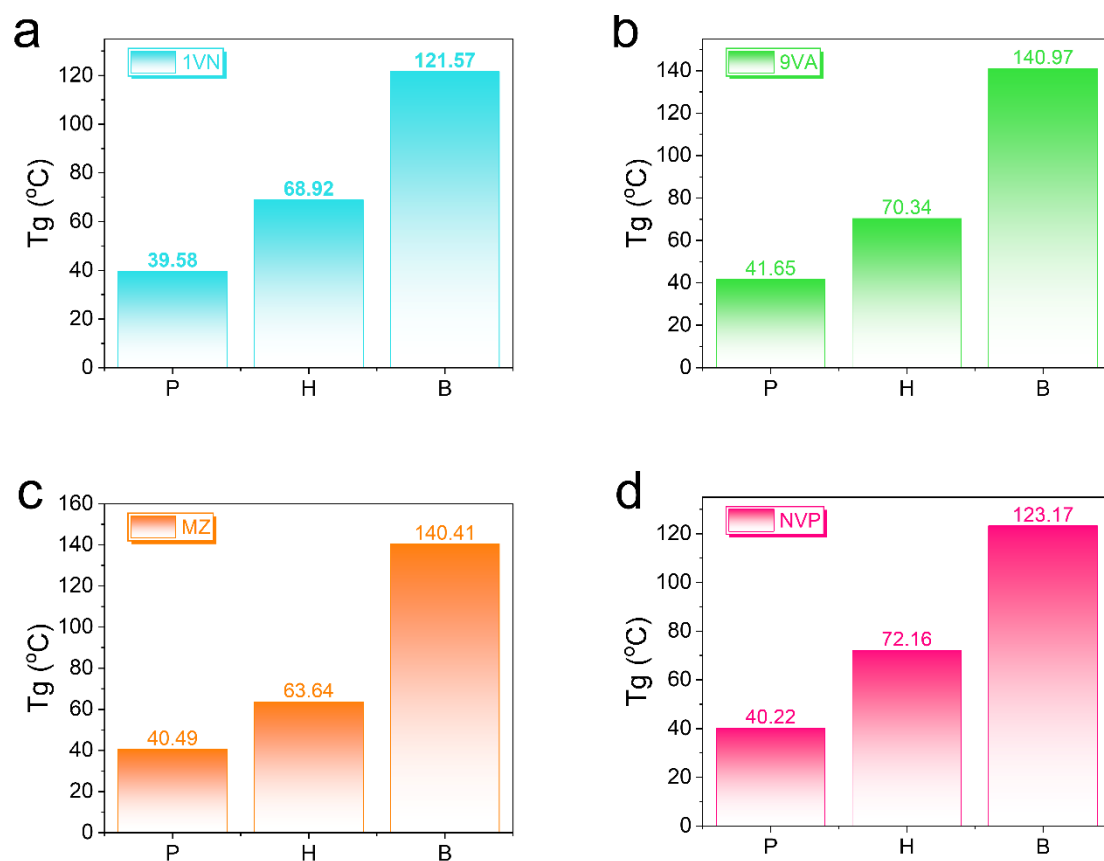

**Supplementary Figure 34. Comparison of  $T_g$ .** a-d Comparison of  $T_g$  from P to B of 1VN (a), 9VA (b), MZ (c), and NVP (d). In P, where there is no hydrogen bonding and no cross-linking network,  $T_g$  is 39.58-41.65 °C. In H, where hydrogen bonding is existent,  $T_g$  is 63.64-72.16 °C, and B is reaching 121.57-140.97 °C via cross-linking.

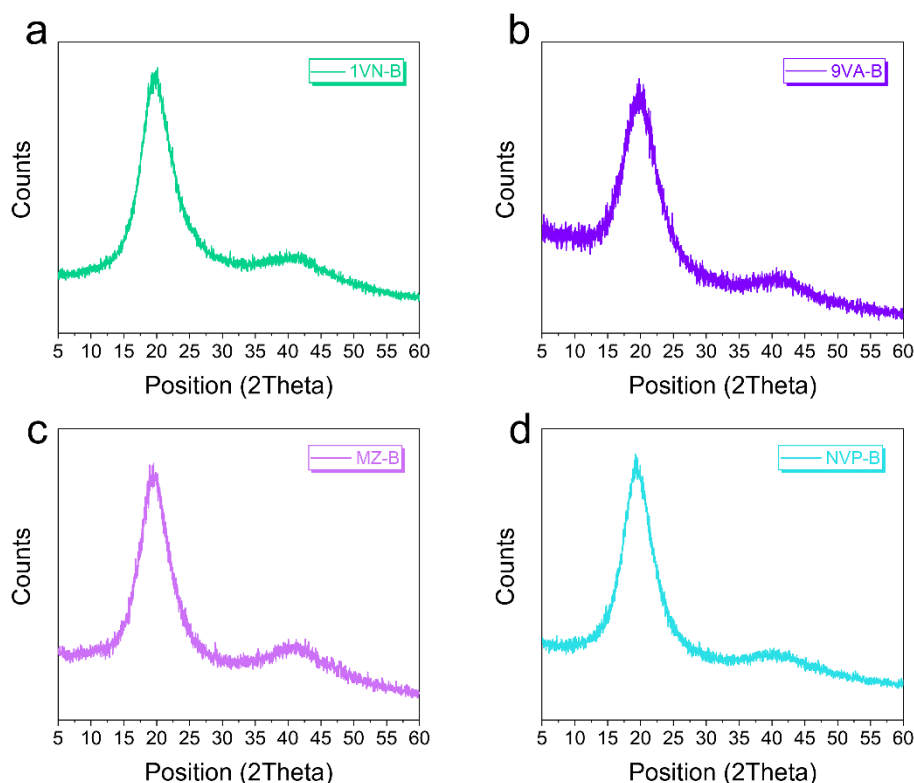

**Supplementary Figure 35. XRD patterns.** a-d Powder X-ray diffraction (XRD) of cross-linked structure at room temperature from 1VN (a), 9VA (b), MZ (c), and NVP (d).

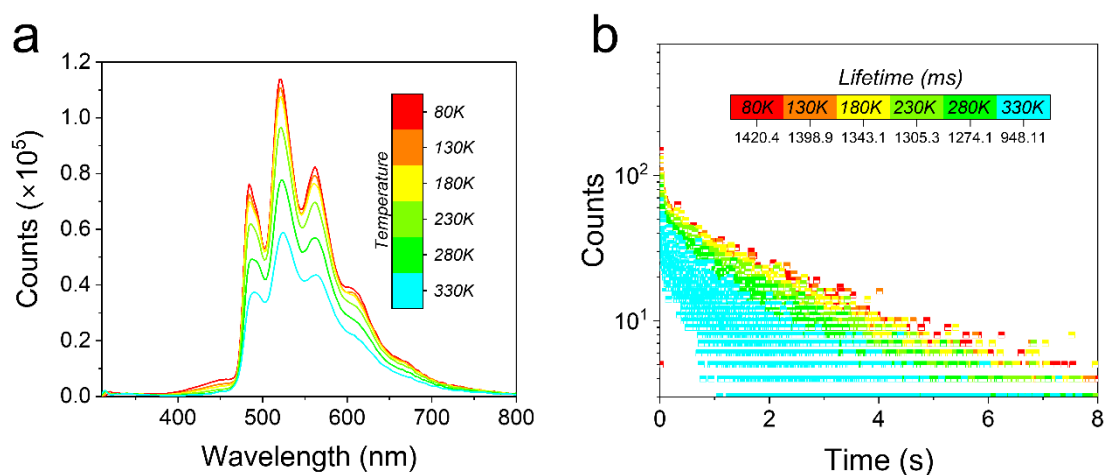

**Supplementary Figure 36. Temperature-dependent phosphorescence as well as decay spectra and fitted lifetime.** a Temperature-dependent phosphorescence of 1VN-B excited by 300 nm  $\mu$ F lamp (delayed 5 ms). b Decay spectra and fitted lifetime from 1VN-B at different temperatures.

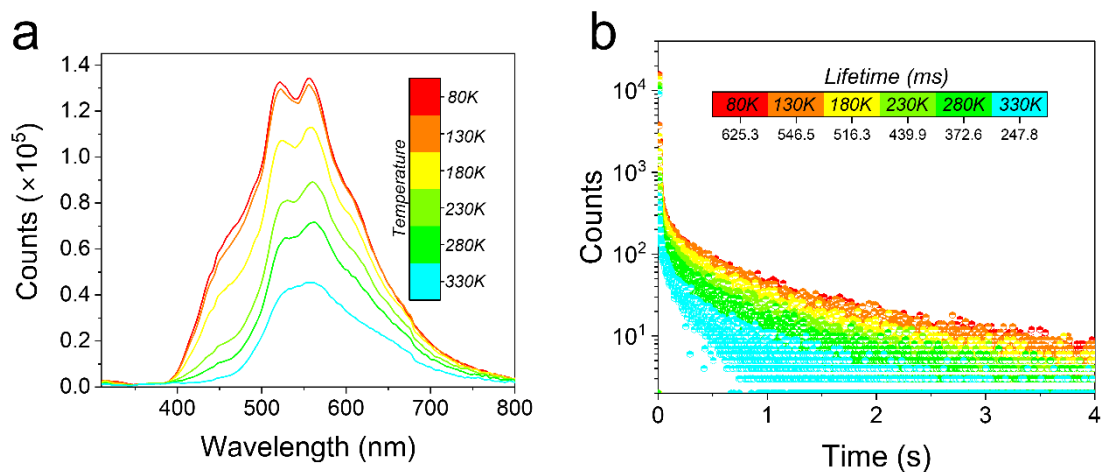

**Supplementary Figure 37. Temperature-dependent phosphorescence as well as decay spectra and fitted lifetime.** **a** Temperature-dependent phosphorescence of 9VA-B excited by 300 nm  $\mu$ F lamp (delayed 5 ms). **b** Decay spectra and fitted lifetime from 9VA-B at different temperatures.

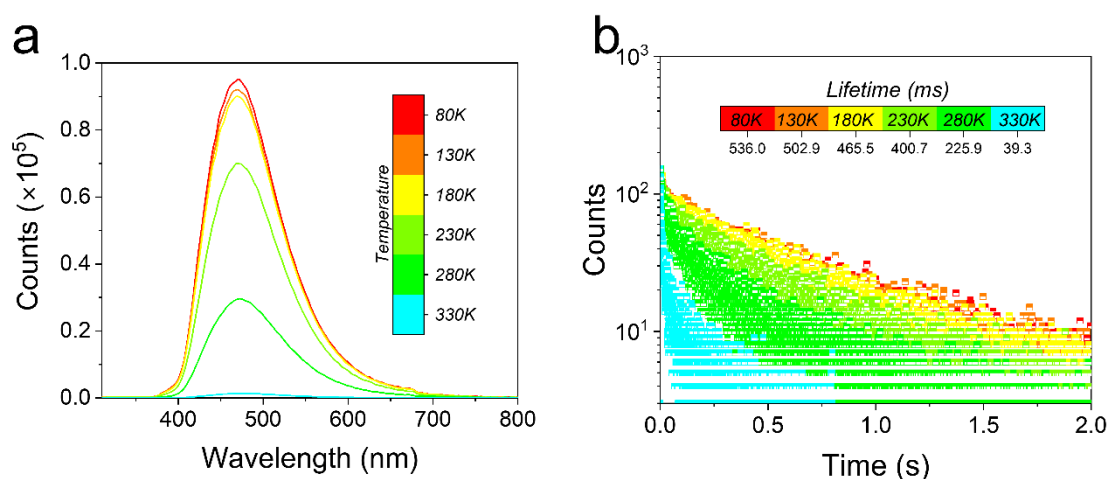

**Supplementary Figure 38. Temperature-dependent phosphorescence as well as decay spectra and fitted lifetime.** **a** Temperature-dependent phosphorescence of MZ-B excited by 300 nm  $\mu$ F lamp (delayed 5 ms). **b** Decay spectra and fitted lifetime from MZ-B at different temperatures.

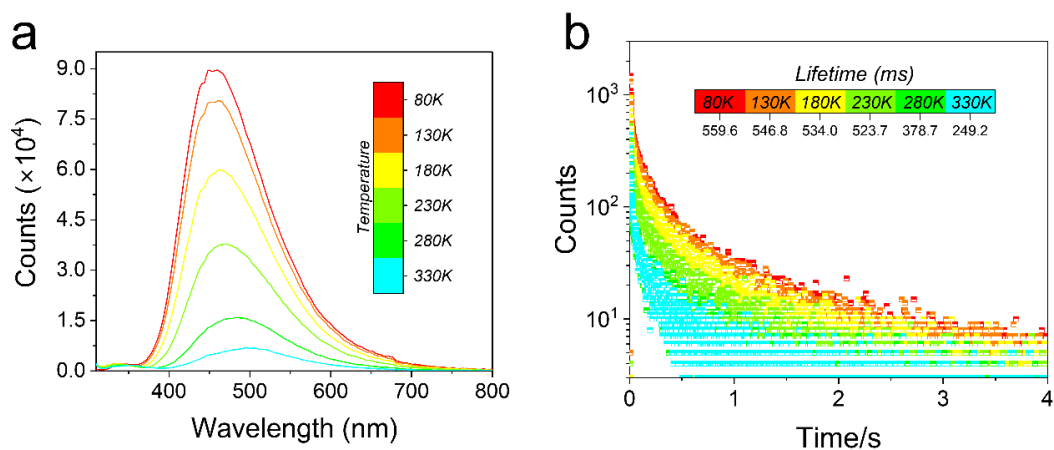

**Supplementary Figure 39. Temperature-dependent phosphorescence as well as decay spectra and fitted lifetime. a** Temperature-dependent phosphorescence of NVP-B excited by 300 nm  $\mu$ F lamp (delayed 5 ms). **b** Decay spectra and fitted lifetime from NVP-B at different temperatures.



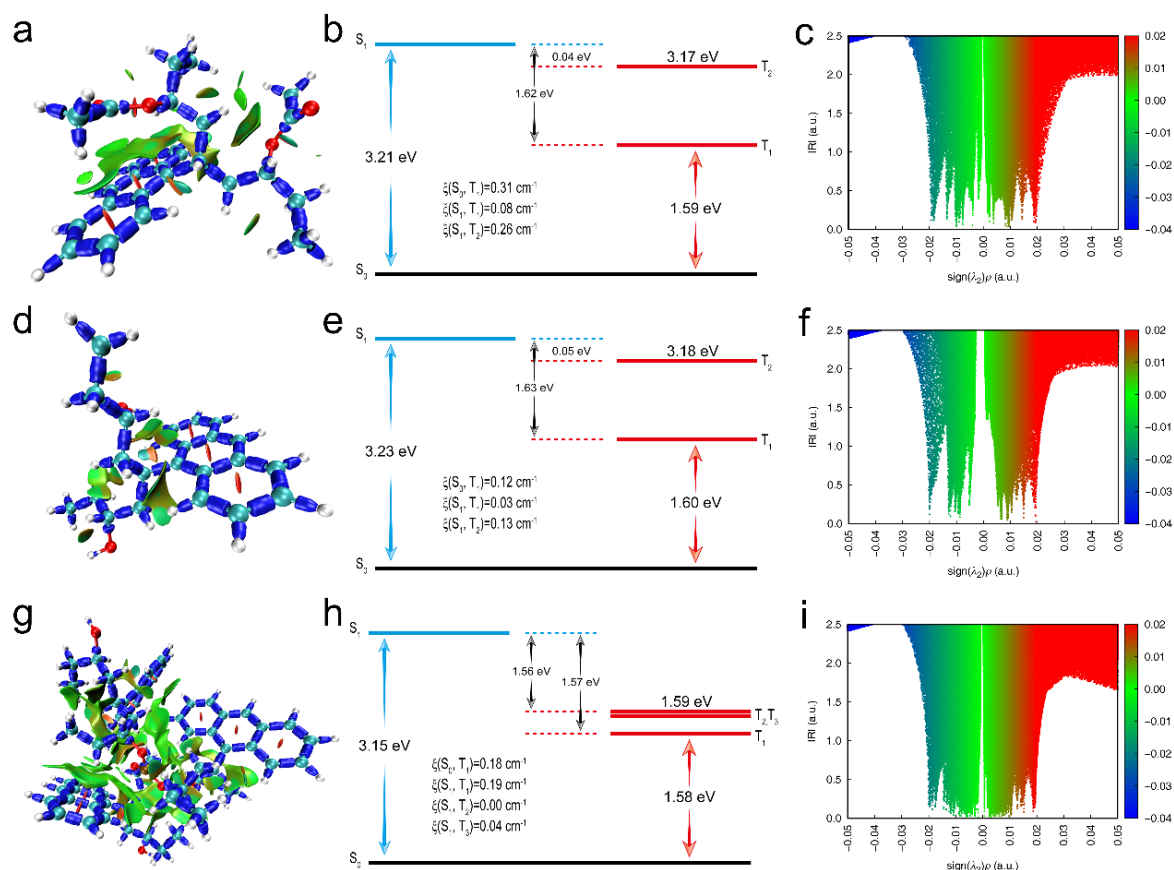

**Supplementary Figure 42. Calculation studies.** a-i 9VA: visualization of interactions in polymerization (a), alcoholysis (d), and cross-linked (g) structures; Theoretical calculation of the optimized simplified model: vertical excitation energy of polymerization (b), alcoholysis (e), and cross-linked (h) with boosted RTP performance: Vertical excitation energies and spin-orbit coupling constant (SOC); Distribution of different interactions via  $\text{sign}(\lambda_2)\rho$  on IRI isosurfaces in polymerization (c), alcoholysis (f), and cross-linked (i). a.u.: atomic units.

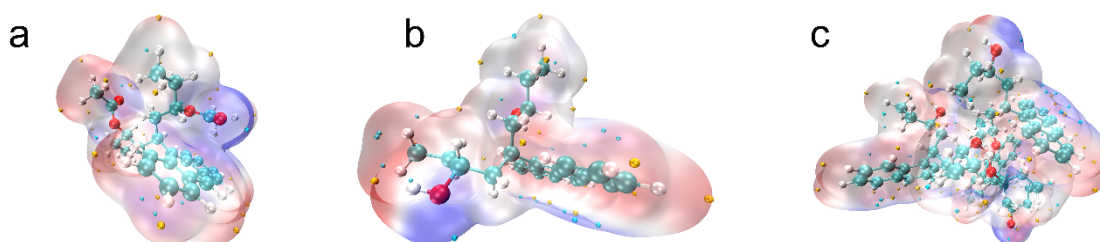

**Supplementary Figure 43. Distribution of ESP.** a-c Distribution of ESP in polymerization (a), alcoholysis (b), and cross-linked (c) structures. Negative potential (blue), positive potential (red), and neutral potential (white). The balls are the extreme point of regional potential (blue: minimum value; yellow: maximum value).





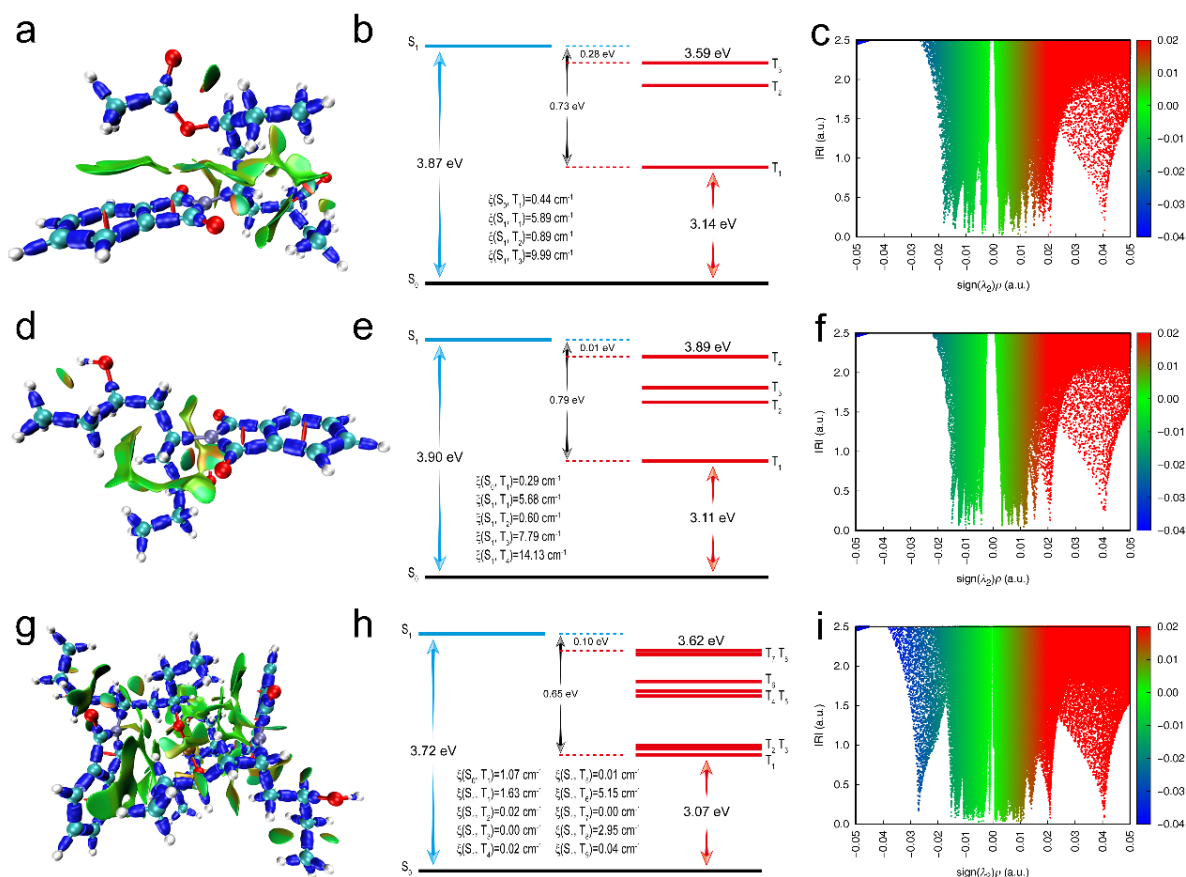

**Supplementary Figure 46. Calculation studies.** a-i NVP: visualization of interactions in polymerization (a), alcoholysis (d), and cross-linked (g) structures; Theoretical calculation of the optimized simplified model: vertical excitation energy of polymerization (b), alcoholysis (e), and cross-linked (h) with boosted RTP performance: Vertical excitation energies and spin-orbit coupling constant (SOC); Distribution of different interactions via  $\text{sign}(\lambda_2)\rho$  on IRI isosurfaces in polymerization (c), alcoholysis (f), and cross-linked (i). a.u.: atomic units.

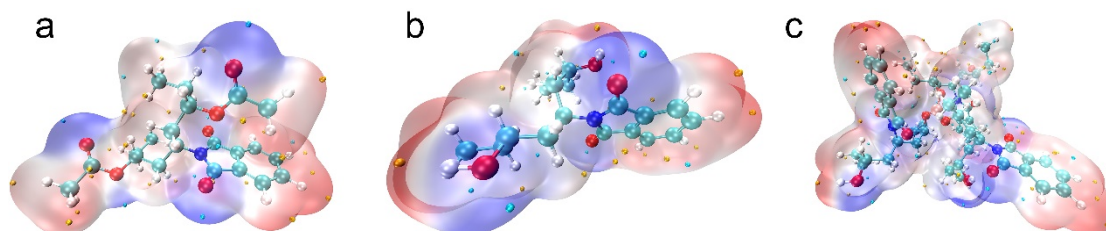

**Supplementary Figure 47. Distribution of ESP.** a-c Distribution of ESP in polymerization (a), alcoholysis (b), and cross-linked (c) structures. Negative potential (blue), positive potential (red), and neutral potential (white). The balls are the extreme point of regional potential (blue: minimum value; yellow: maximum value).

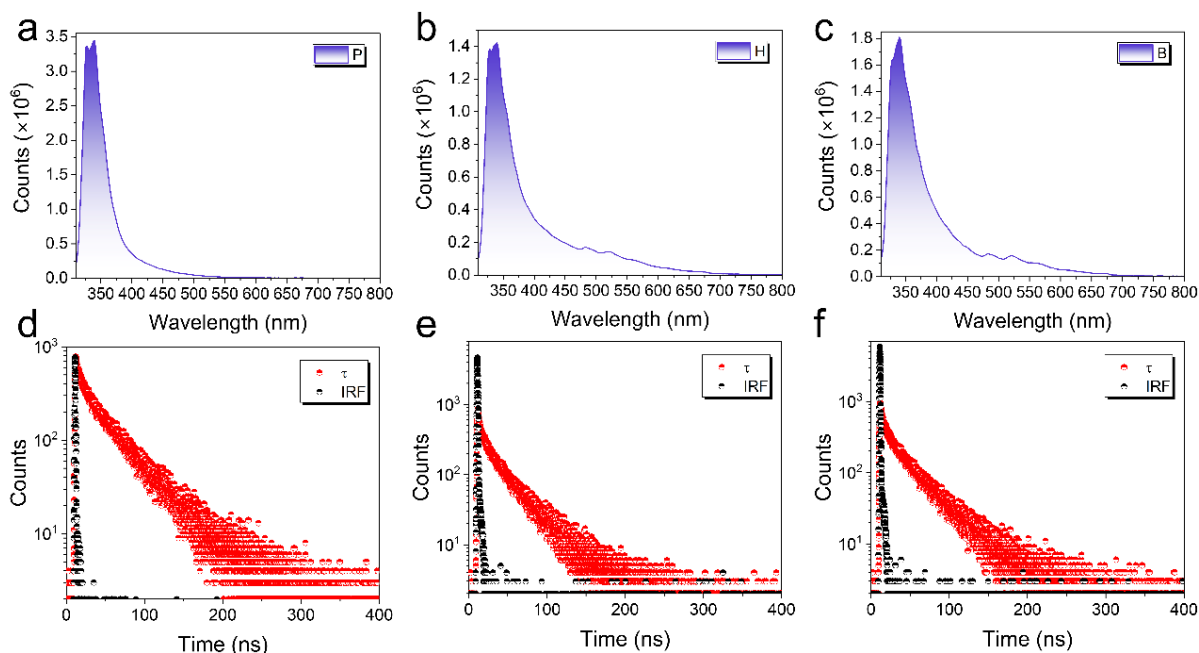

**Supplementary Figure 48. Photoluminescence spectra and decay spectra.** a-c Photoluminescence spectra of 1VN at  $\lambda_{\text{ex}} = 300$  nm from P (a), H (b), and B (c). d-f Photoluminescence decay spectra with IRF at  $\lambda_{\text{em}} = 340$  nm, 340 nm, and 340 nm for P (d), H (e), and B (f).

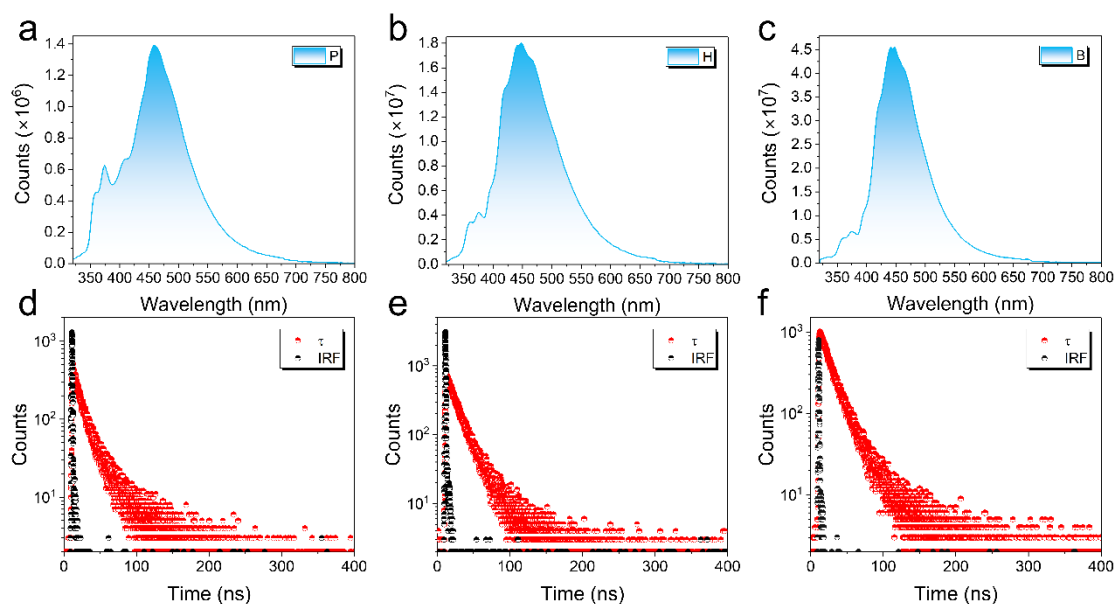

**Supplementary Figure 49. Photoluminescence spectra and decay spectra.** a-c Photoluminescence spectra of 9VA at  $\lambda_{\text{ex}} = 300$  nm from P (a), H (b), and B (c). d-f Photoluminescence decay spectra with IRF at  $\lambda_{\text{em}} = 450$  nm, 448 nm, and 448 nm for P (d), H (e), and B (f).

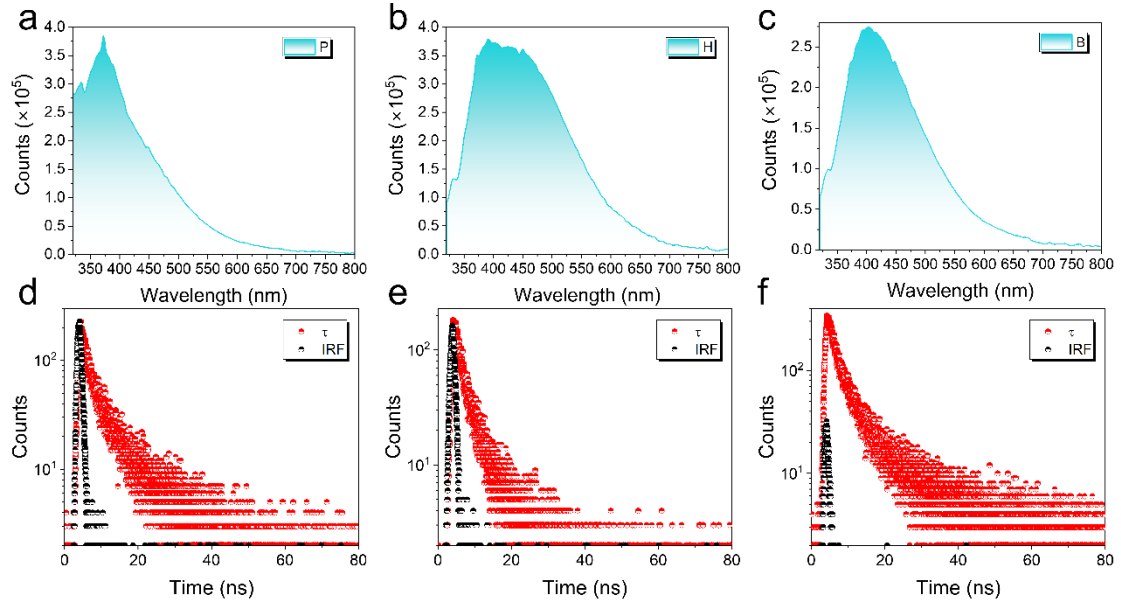

**Supplementary Figure 50. Photoluminescence spectra and decay spectra.** a-c Photoluminescence spectra of MZ at  $\lambda_{\text{ex}} = 300$  nm from P (a), H (b), and B (c). d-f Photoluminescence decay spectra with IRF at  $\lambda_{\text{em}} = 372$  nm, 392 nm, and 402 nm for P (d), H (e), and B (f).

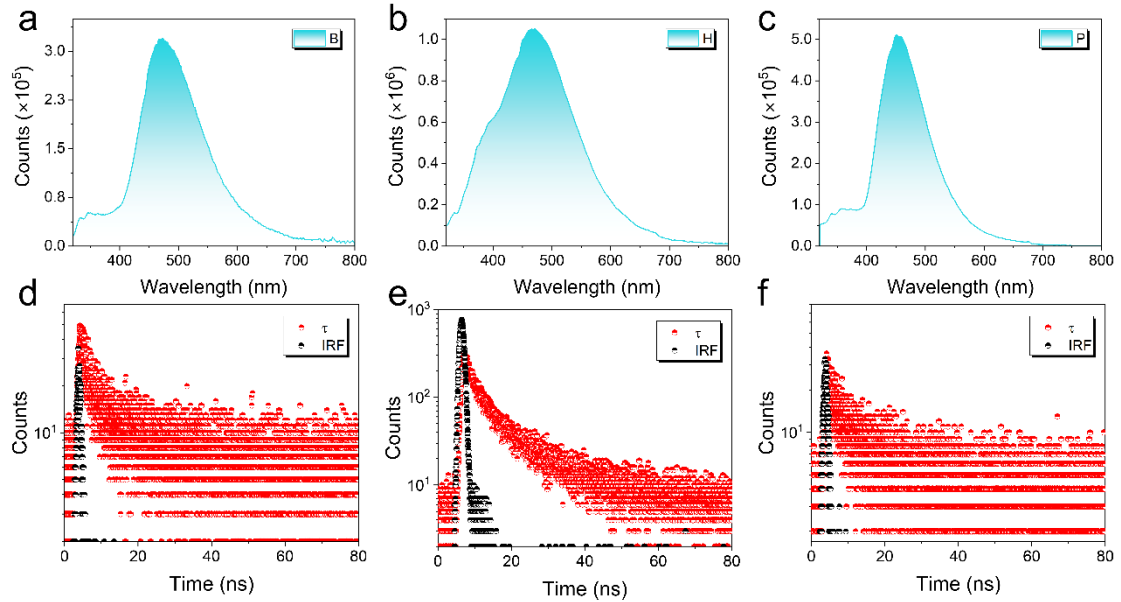

**Supplementary Figure 51. Photoluminescence spectra and decay spectra.** a-c Photoluminescence spectra of NVP at  $\lambda_{\text{ex}} = 300$  nm from P (a), H (b), and B (c). d-f Photoluminescence decay spectra with IRF at  $\lambda_{\text{em}} = 452$  nm, 466 nm, and 472 nm for P (d), H (e), and B (f).

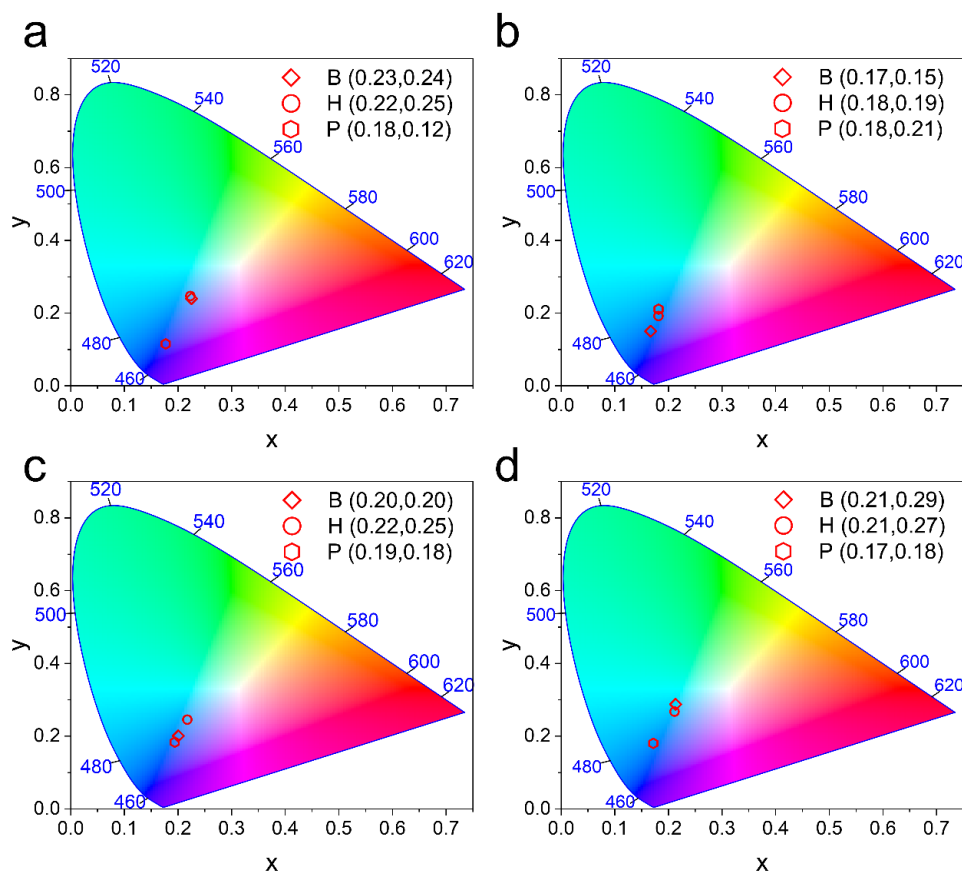

**Supplementary Figure 52. CIE coordinates. a-d** CIE coordinates from the photoluminescence spectra exhibiting a blue color.

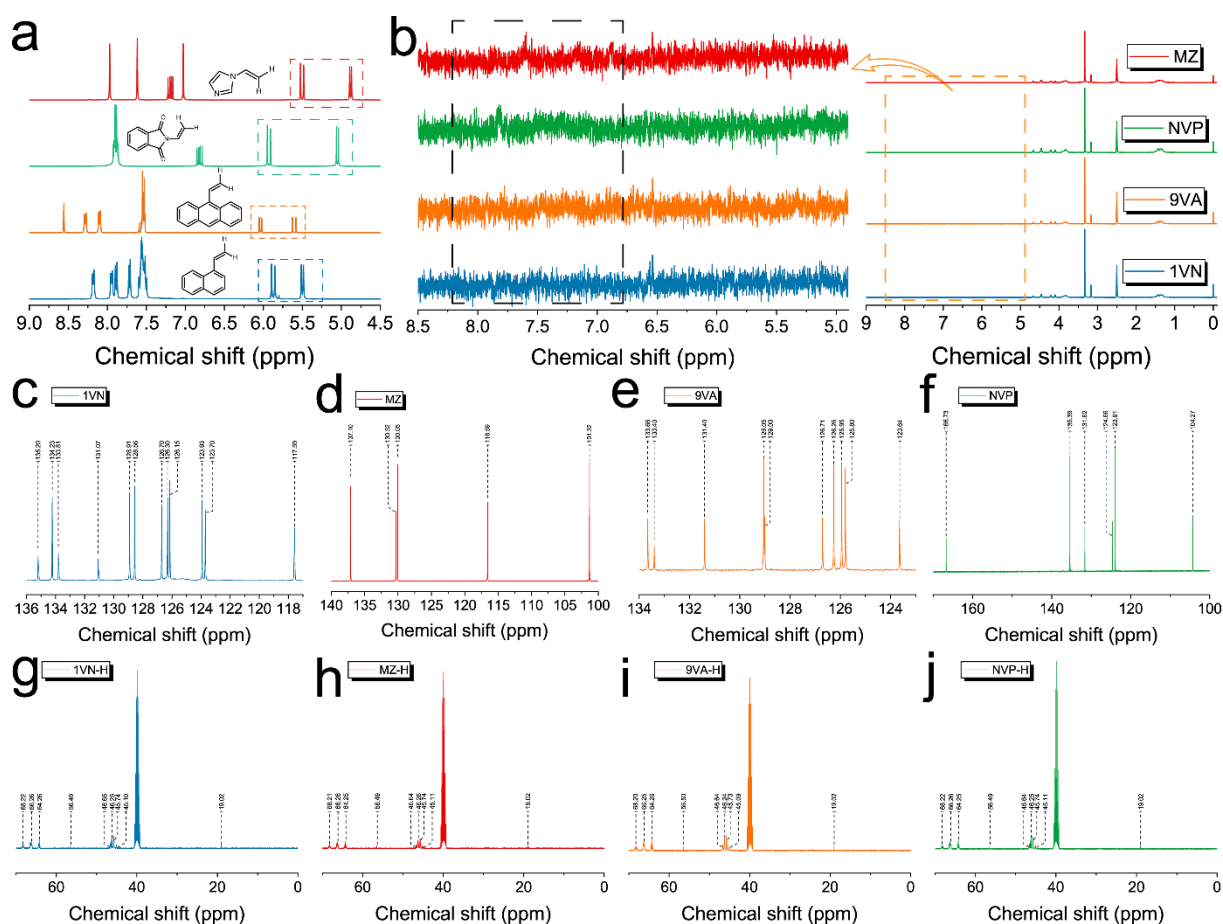

**Supplementary Figure 53.  $^1\text{H}$  and  $^{13}\text{C}$  NMR spectra.** a,b  $^1\text{H}$  NMR of phosphors (a) and the copolymer after alcoholysis (b) obtained from  $\text{DMSO-}d_6$ . c-j  $^{13}\text{C}$  NMR of different phosphors (c-f) and their copolymer after alcoholysis (g-j) obtained from  $\text{DMSO-}d_6$ . The signal of H from the vinyl group at 5.0-6.2 ppm in 1VN, 9VA, MZ, and NVP became nearly undetectable in copolymers upon converting to the alcohol hydroxyl at 4.22-4.67 ppm, while it additionally gathered aromatic ring H vibrations around 7.0-8.5 ppm (black dotted box).



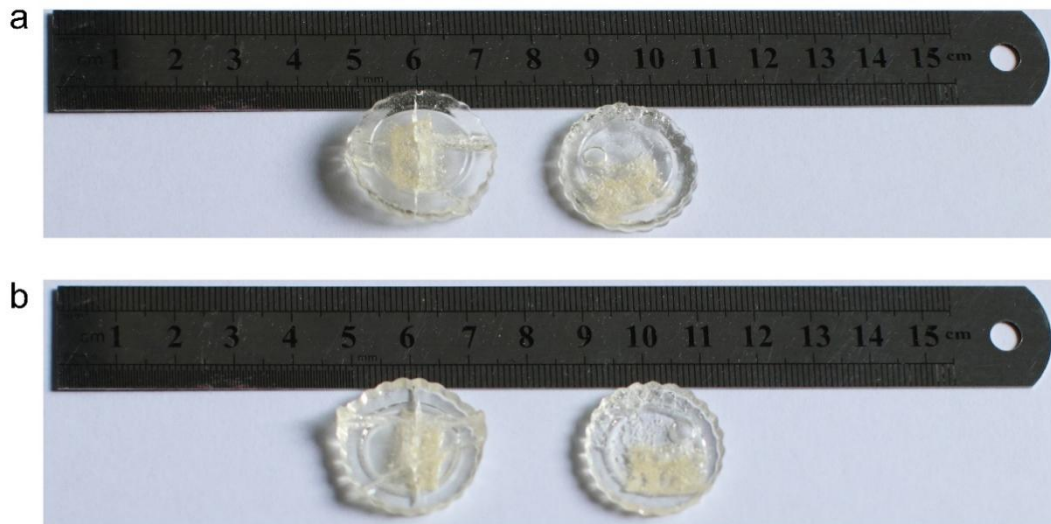

**Supplementary Figure 54. Pictures of crack.** a,b Pictures showing the sample with the crack (left) and the control group (right) of the back (a) and front (b) in the sunlight, as well as the shape of the crack.

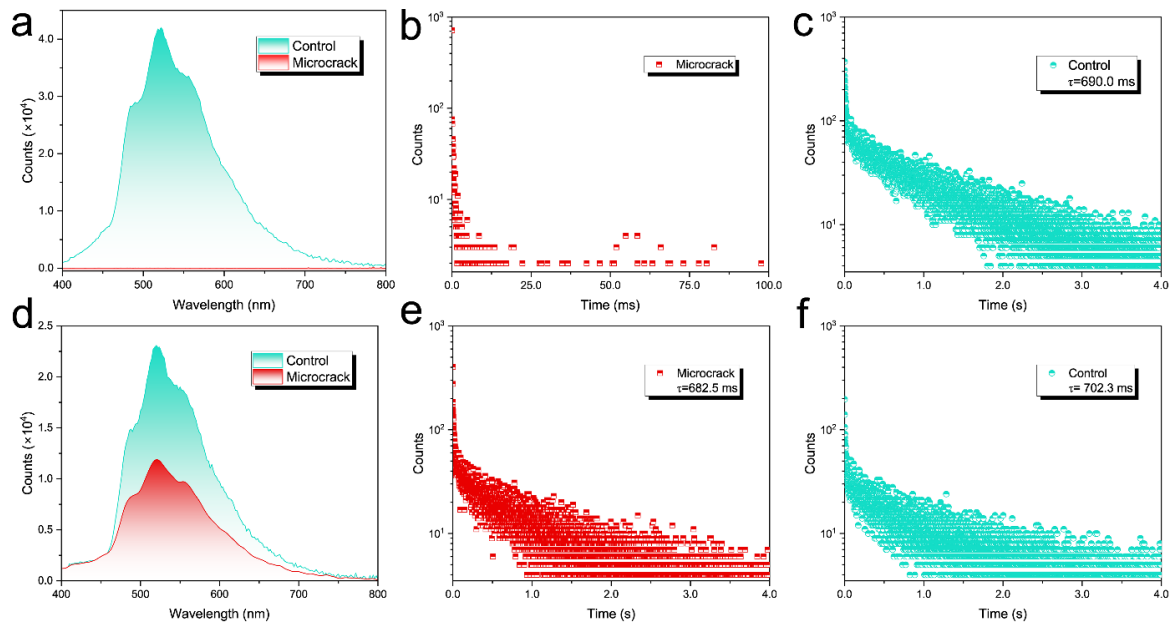

**Supplementary Figure 55. Phosphorescence spectra as well as decay spectra and their lifetime.** a-f Phosphorescence spectra of control and microcrack groups after fumigation (a) and the recovery (d); Decay spectra and their lifetime of control and microcrack groups after fumigation (b, c) and the recovery (e, f). The cracked sample was pretreated by fumigation, followed by cooling down to room temperature. The control parts were exposed to ambient conditions during the experiments for this period. These two groups of phosphorescence were compared under the same conditions.

|                  |   |           |           |
|------------------|---|-----------|-----------|
| — • — •          | C | • — — —   | 1         |
| — — • —          | Q | — — — •   | 9         |
| • • —            | U | • • • • — | 4         |
| —                | T | — — — —   | 0         |
| Morse code table |   |           |           |
| • • I            | M | • I — —   | I S S U — |
| — —              | S | • • — —   |           |

**Supplementary Figure 56.** Morse password decryption comparison table.



## Supplementary Tables

**Supplementary Table 1.** Properties of copolymers with functionalized phosphors groups to develop ambient RTP materials from recent research.

| Sample |        | Em/nm | $\tau$ /ms | $\Phi_p$ /% | Reference |
|--------|--------|-------|------------|-------------|-----------|
| PAA    | PAA    | 488   | 31.7       | 4.5         | 12        |
|        | PAANa  | 478   | 124.9      | 7.6         | 12        |
|        | PBPh   | 485   | 1646.1     | 5.3         | 13        |
|        | R-PBNA | 520   | 88.7       | 30.6        | 14        |
| PAM    | PH-1   | 490   | 1463       | 10.1        | 15        |
|        | PAM-N1 | 494   | 1534.6     | 12.0        | 16        |
|        | BAA    | 477   | 351        | N/A         | 17        |
| PSS    | PSSLi  | 550   | 1308       | N/A         | 18        |
|        | PSS    | 496   | 1007       | N/A         | 19        |
| PVP    | PVP-S  | 524   | 578.4      | 6.4         | 20        |

**Note:** PAA: polyacrylic acid; PAM: polyacrylamide; PSS: polystyrene sulfonic acid; PVP: polyvinyl pyridine, Em: emission wavelength,  $\tau$ : phosphorescence lifetime,  $\Phi_p$ : phosphorescence quantum yields. N/A: no recorded data found.

**Supplementary Table 2.** Naming of series 1 to 4 and different phosphorescence units.

| VAc : Phosphor            | 2VN   |       |       |        | 1VN   | 9VA   | MZ   | NVP   |
|---------------------------|-------|-------|-------|--------|-------|-------|------|-------|
|                           | 300:1 | 500:1 | 700:1 | 1000:1 |       |       |      |       |
| <b>Polymerization (P)</b> | P1    | P2    | P3    | P4     | 1VN-P | 9VA-P | MZ-P | NVP-P |
| <b>Alcoholysis (H)</b>    | H1    | H2    | H3    | H4     | 1VN-H | 9VA-H | MZ-H | NVP-H |
| <b>Cross-linking (B)</b>  | B1    | B2    | B3    | B4     | 1VN-B | 9VA-B | MZ-B | NVP-B |

**Note:** VAc : Phosphor means molar ratio.

**Supplementary Table 3.** Photophysical parameters of 2VN with different feed ratios of polymerization (P), alcoholysis (H), and crosslinked (B) under ambient conditions.

| Systems | Fluorescence |                    |             |                         | Phosphorescence |                    |             |                       |                          |
|---------|--------------|--------------------|-------------|-------------------------|-----------------|--------------------|-------------|-----------------------|--------------------------|
|         | Em/nm        | $\tau_F/\text{ns}$ | $\Phi_F/\%$ | $k_{isc}/\text{s}^{-1}$ | Em/nm           | $\tau_P/\text{ms}$ | $\Phi_P/\%$ | $k_r^P/\text{s}^{-1}$ | $k_{nr}^P/\text{s}^{-1}$ |
| B1      | 338          | 41.2               | 18.73       | $1.0 \times 10^6$       | 520             | 1197.5             | 4.29        | $3.6 \times 10^{-2}$  | $8.0 \times 10^{-1}$     |
| H1      | 340          | 35.4               | 19.97       | $6.2 \times 10^5$       | 520             | 721.2              | 2.19        | $3.0 \times 10^{-2}$  | $1.4 \times 10^0$        |
| P1      | 340          | 45.8               | 45.57       | $6.6 \times 10^3$       | 558             | 0.3                | 0.03        | $1.0 \times 10^0$     | $3.3 \times 10^3$        |
| B2      | 336          | 34.8               | 10.37       | $1.6 \times 10^6$       | 520             | 1230.4             | 5.64        | $4.6 \times 10^{-2}$  | $7.7 \times 10^{-1}$     |
| H2      | 338          | 30.9               | 10.31       | $1.0 \times 10^6$       | 520             | 753.9              | 3.11        | $4.1 \times 10^{-2}$  | $1.3 \times 10^0$        |
| P2      | 336          | 36.6               | 44.80       | $3.0 \times 10^4$       | 522             | 1.4                | 0.11        | $7.9 \times 10^{-1}$  | $7.1 \times 10^2$        |
| B3      | 336          | 42.0               | 21.37       | $2.4 \times 10^6$       | 520             | 1263.6             | 10.17       | $8.0 \times 10^{-2}$  | $7.1 \times 10^{-1}$     |
| H3      | 338          | 38.8               | 10.12       | $6.4 \times 10^5$       | 520             | 761.8              | 2.50        | $3.3 \times 10^{-2}$  | $1.3 \times 10^0$        |
| P3      | 338          | 50.8               | 43.27       | $1.2 \times 10^4$       | 518             | 4.7                | 0.06        | $1.3 \times 10^{-1}$  | $2.1 \times 10^2$        |
| B4      | 340          | 40.2               | 11.12       | $1.6 \times 10^6$       | 520             | 1231.9             | 6.52        | $5.3 \times 10^{-2}$  | $7.6 \times 10^{-1}$     |
| H4      | 340          | 35.5               | 13.27       | $9.8 \times 10^5$       | 522             | 720.4              | 3.47        | $4.8 \times 10^{-2}$  | $1.3 \times 10^0$        |
| P4      | 340          | 43.2               | 44.09       | $2.8 \times 10^4$       | 508             | 4.7                | 0.12        | $2.6 \times 10^{-1}$  | $2.1 \times 10^2$        |

**Supplementary Table 4.** Molecular weights by GPC for the alcoholysis systems from 1VN, 2VN, 9VA, MZ, and NVP with water as the mobile phase.

| Systems | Mn        | Mw        | Mp        | Mz        | Mz+1      | PDI    | Mz/Mw | Mz+1/Mw |      |
|---------|-----------|-----------|-----------|-----------|-----------|--------|-------|---------|------|
|         | (Daltons) | (Daltons) | (Daltons) | (Daltons) | (Daltons) |        |       |         |      |
| 2VN     | H1        | 26549     | 50173     | 47547     | 77447     | 106971 | 1.89  | 1.54    | 2.13 |
|         | H2        | 23516     | 45143     | 40851     | 71652     | 102457 | 1.92  | 1.59    | 2.27 |
|         | H3        | 24183     | 44026     | 41056     | 67162     | 92457  | 1.82  | 1.53    | 2.10 |
|         | H4        | 25471     | 46278     | 43508     | 70394     | 96327  | 1.82  | 1.52    | 2.08 |
| 1VN-H   | 33029     | 63146     | 57810     | 101830    | 146714    | 1.91   | 1.61  | 2.32    |      |
| 9VA-H   | 29228     | 58191     | 51240     | 96671     | 140240    | 1.99   | 1.66  | 2.41    |      |
| MZ-H    | 31120     | 61127     | 55068     | 101113    | 149582    | 1.96   | 1.65  | 2.44    |      |
| NVP-H   | 31591     | 62928     | 57855     | 103105    | 149698    | 1.99   | 1.64  | 2.38    |      |

**Note:** Considering the solubility after cross-linking, the sample after alcoholysis was selected to characterize the molecular weight.

**Supplementary Table 5.** Photophysical parameters of polymerization (P), alcoholysis (H), and crosslinked (B) from different phosphors under ambient conditions.

| Fluorescence |       |              |             |                   | Phosphorescence |              |             |                      |                      |
|--------------|-------|--------------|-------------|-------------------|-----------------|--------------|-------------|----------------------|----------------------|
| systems      | Em/nm | $\tau_F$ /ns | $\Phi_F$ /% | $k_{isc}/s^{-1}$  | Em/nm           | $\tau_P$ /ms | $\Phi_P$ /% | $k_r^P/s^{-1}$       | $k_{nr}^P/s^{-1}$    |
| <b>1VN</b>   |       |              |             |                   |                 |              |             |                      |                      |
| B            | 340   | 38.0         | 11.20       | $1.8 \times 10^6$ | 524             | 1247.1       | 6.72        | $5.4 \times 10^{-2}$ | $7.5 \times 10^{-1}$ |
| H            | 340   | 31.4         | 8.46        | $1.4 \times 10^6$ | 524             | 1028.8       | 4.33        | $4.2 \times 10^{-2}$ | $9.3 \times 10^{-1}$ |
| P            | 340   | 42.0         | 31.20       | $1.9 \times 10^4$ | 404             | 7.3          | 0.08        | $1.1 \times 10^{-1}$ | $1.4 \times 10^2$    |
| <b>9VA</b>   |       |              |             |                   |                 |              |             |                      |                      |
| B            | 448   | 18.3         | 31.00       | $6.3 \times 10^5$ | 558             | 256.5        | 1.15        | $4.5 \times 10^{-2}$ | $3.9 \times 10^0$    |
| H            | 448   | 15.1         | 17.24       | $4.0 \times 10^5$ | 570             | 95.9         | 0.60        | $6.3 \times 10^{-2}$ | $1.0 \times 10^1$    |
| P            | 450   | 22.0         | 11.61       | 0                 | 566             | 14.3 $\mu$ s | N/A         | 0                    | $7.0 \times 10^4$    |
| <b>NVP</b>   |       |              |             |                   |                 |              |             |                      |                      |
| B            | 472   | 7.5          | 11.31       | $2.1 \times 10^7$ | 482             | 338.3        | 16.04       | $4.7 \times 10^{-1}$ | $2.5 \times 10^0$    |
| H            | 466   | 2.7          | 7.42        | $1.4 \times 10^7$ | 490             | 262.3        | 3.68        | $1.4 \times 10^{-1}$ | $3.7 \times 10^0$    |
| P            | 452   | 8.3          | 17.47       | $1.3 \times 10^6$ | 480             | 24.2         | 1.05        | $4.3 \times 10^{-1}$ | $4.1 \times 10^1$    |
| <b>MZ</b>    |       |              |             |                   |                 |              |             |                      |                      |
| B            | 402   | 4.2          | 7.18        | $2.8 \times 10^6$ | 486             | 499.1        | 1.19        | $2.4 \times 10^{-2}$ | $2.0 \times 10^0$    |
| H            | 392   | 3.7          | 3.44        | $1.4 \times 10^6$ | 492             | 281.3        | 0.52        | $1.8 \times 10^{-2}$ | $3.5 \times 10^0$    |
| P            | 372   | 5.4          | 4.38        | $1.5 \times 10^5$ | 510             | 1.2          | 0.08        | $6.7 \times 10^{-1}$ | $8.3 \times 10^2$    |

**Note:** Phosphorescence quantum yield of 9VA-P was too weak to be detected and thus represented by N/A. When calculating  $k_{isc}$  and  $k_r^P$ ,  $\Phi_P$  is treated as 0.

## Supplementary References

1. Feng, H. et al. Tuning molecular emission of organic emitters from fluorescence to phosphorescence through push-pull electronic effects. *Nat. Commun.* **11**, 2617 (2020).
2. Tao, Y. et al. Resonance-activated spin-flipping for efficient organic ultralong room-temperature phosphorescence. *Adv. Mater.* **30**, 1803856 (2018).
3. Zhang, Y. et al. Ultraviolet irradiation-responsive dynamic ultralong organic phosphorescence in polymeric systems. *Nat. Commun.* **12**, 2297 (2021).
4. Wang, X. et al. Organic phosphors with bright triplet excitons for efficient X-ray-excited luminescence. *Nat. Photon.* **15**, 187–192 (2021).
5. Zhu, T. et al. Clustering and halogen effects enabled red/near-infrared room temperature phosphorescence from aliphatic cyclic imides. *Nat. Commun.* **13**, 2658 (2022).
6. Zhou, W. L. et al. Ultralong purely organic aqueous phosphorescence supramolecular polymer for targeted tumor cell imaging. *Nat. Commun.* **11**, 4655 (2020).
7. Neese, F., Wennmohs, F., Becker, U. & Riplinger, C. The ORCA quantum chemistry program package. *J. Chem. Phys.* **152**, 224108 (2020).
8. Manzetti, S. & Lu, T. The geometry and electronic structure of aristolochic acid: possible implications for a frozen resonance. *J. Phys. Org. Chem.* **26**, 473–483 (2013).
9. Zhang, J. & Lu, T. Efficient evaluation of electrostatic potential with computerized optimized code. *Phys. Chem. Chem. Phys.* **23**, 20323–20328 (2021).
10. Lu, T. & Chen, F. Multiwfn: A multifunctional wavefunction analyzer. *J. Comput. Chem.* **33**, 580–592 (2012).
11. Humphrey, W., Dalke, A. & Schulten, K. VMD: visual molecular dynamics. *J. Molec. Graph.* **14**, 33–38 (1996).
12. Zhou, Q. et al. Emission mechanism understanding and tunable persistent room temperature phosphorescence of amorphous nonaromatic polymers. *Mater. Chem. Front.* **3**, 257–264 (2019).
13. Gan, N. et al. Organic phosphorescent scintillation from copolymers by X-ray irradiation. *Nat. Commun.* **13**, 3995 (2022).
14. Gu, L. et al. Circularly polarized organic room temperature phosphorescence from

- amorphous copolymers. *J. Am. Chem. Soc.* **143**, 18527–18535 (2021).
15. Wang, S., Wu, D., Yang, S., Lin, Z. & Ling, Q. Regulation of clusterization-triggered phosphorescence from a non-conjugated amorphous polymer: a platform for colorful afterglow. *Mater. Chem. Front.* **4**, 1198–1205 (2020).
  16. Zhang, Z. Y. et al. A synergistic enhancement strategy for realizing ultralong and efficient room-temperature phosphorescence. *Angew. Chem. Int. Ed.* **59**, 18748–18754 (2020).
  17. Wu, Q. et al. Self-Healing Amorphous Polymers with Room-Temperature Phosphorescence Enabled by Boron-Based Dative Bonds. *ACS Appl. Polym. Mater.* **2**, 699–705 (2020).
  18. Ogoshi, T. et al. Ultralong room-temperature phosphorescence from amorphous polymer poly(styrene sulfonic acid) in air in the dry solid state. *Adv. Funct. Mater.* **28**, 1707369 (2018).
  19. Cai, S. et al. Enabling long-lived organic room temperature phosphorescence in polymers by subunit interlocking. *Nat. Commun.* **10**, 4247 (2019).
  20. Wang, H. et al. Amorphous ionic polymers with color-tunable ultralong organic phosphorescence. *Angew. Chem. Int. Ed.* **58**, 18776–18782 (2019).
